# Supplementary material for: Viroid-infected Tomato and Capsicum Seed Shipments to Australia
Source: MDPI journal article supplement (doi:10.3390/v11020098), 2019-01-24
Supplement: s1 [file s1]

### Supplementary file 3. Viroid sequences.

Isolate Name Convention: Viroid species, host, location, submission ref and first initial of lab

Host: Ca= Capsicum; To = Tomato,

Region: As = Asia; Eu = Europe; EA – east Asia; ME = middle east; Nam = North America; NK = region not known; Sam = South America; Sas – South Asia

Lab: C=CHS; E = EAMI

#### CLVd

>CLVdCaEu16169C

TTCAGACAGGAGTAATACCAGCTGAAACAGGGTTTTACCCCTTCCTTTCTTCTGGTTTCCTTCCTCTGCTTCAGCGGCCTCG  
CCCGGAGTCTTGACCAGCGCAGGTTCTGACGCGACCGGTGGCATCACCGAGTTCGCTCAAGCCTCAACCTCCTTTTTCTTC  
ATTCTAGCTTGGTCTCCGGGCGAGGGTGTGTTAGCCCTTGGAACCGCAGTTGGTTCCTCGGAATAAAGCTCGTGGTTCCTGT  
GGTTCACACCTGACCCTGCAGCCATGCAAAGAAAAAAGAACGGGAGGAAGAGCGCAAGAGCGGTCTCAGGAGCCCC

>CLVdToEu1413127C

ATAGGAGGGGGTCTGAGACTGCTAATGCGCTCTTCTACCGTTCCTTTAGTTCTTTGGAAGGTTGCAGGGTCAGGTGTGA  
AACACAGGAACAGGAGTTTAGTTCCGAGGAGCCGTATGCGGTTCCAGGGCTAAACACCCTCGCCCGACACCATTTCTAT  
AATGATCAAAAAGGAGGTTGAGGCTTGAGCGAACTCGGTGATGCCGCCGGTCGCGTCAGAACCTGTGCTGGTCAAGACT  
CCGGGCGAGGCCGTGAAGCAGAGGACGACACcATACTAAAGGAAGGGTGAAAAACCCTGTTTCCCTGGGATTACTCCT  
GTCTGAACCGGCTTCGCCATTGTTCAAGACCCCGCTCCGTCTGATTTTCTACTCCCCC

>CLVdCaEA1302154C

CGGAATAAAGCTCGTGGTTCCTGTGGTTCACACCTGACCCTGCAGCCATGCAAAGAAAAAAGAACGGGAGGAAGAGCG  
CAAGAGCGGTCTCAGGAGCCCCGGGGCAACTCAGACCGAGCGGGGTCTTGACCAAGTGGCGAGCGCCCTGTTCAAGACAG  
GAGTAATCCAGCTGAAACAGGGTTTTACCCCTTCCTTTCTTCTGGTTTCCTTCCTCTGCTTCAGCGGCCTCGCCCGGAGTC  
TTGACCAGCGCAGGTTCTGACGCGACCGGTGGCATCACCGAGTTCGCTCAAGCCTCAACCTCCTTTTTCTTATTCTAGCTT  
GGTCTCCGGGCGAGGGTGTTAGCCCTTGGAACCGCAGTTGGTTCCT

>CLVdToEu13/684bE (renamed=CLVdToEu1285bE)

CGGAATAAAGCTCGTGGTTCCTGTGGTTCACACCTGACCCTGCAGCCATGCAAAGAAAAAAGAACGGGAGGAAGAGCG  
CAAGAGCGGTCTCAGGAGCCCCGGGGCAACTCAGACCGAGCGGGGTCTTGACCAAGTGGCGAGCGCCCTGTTCAAGACAG  
GAGTAATCCAGCTGAAACAGGGTTTTACCCCTTCCTTTCTTCTGGTTTCCTTCCTCTGCTTCAGCGGCCTCGCCCGGAGTC  
TTGACCAGCGCAGGTTCTGACGCGACCGGTGGCATCACCGAGTTCGCTCAAGCCTCAATCTCCTTTTTCTTATTCTAGCTT  
TGGTCTCCGGGCGAGGGTGTTAGCCCTTGGAACCGCAGTTGGTTCCT

>CLVdToME13/159E (renamed= CLVdToME1155E)

CGGAATAAAGCTCGTGGTTCCTGTGGTTCACACCTGACCCTGCGGCCATGCAAAAAAAGAACGGGAGGAAGAGCGC  
AAAGAGCGGTCTCAGGAGCCCCGGGGCAACTCAGACCGAGCGGGGTCTTGACCAAGTGGCGAGCGCCCTGTTCAAGACAG  
GAGTAATCCAGCTGAAACAGGGTTTTACCCCTTCCTTTCTTCTGGTTTCCTTCCTCTGCTTCAGCGGCCTCGCCCGGAGTC  
TTGACCAGCGCAGGTTCTGACGCGACCGGTGGCATCACCGAGTTCGCTCAAGCCTCAACCTCCTTTTTCTTATTCTAGCTT  
GTCTCCGGGCGAGGGTGTTAGCCCTTGGAACCGCAGTTGGTTCCT

>CLVdToME13/421E (= CLVdToME1273E)

CGGAATAAAGCTCGTGGTTCCTGTGGTTCACACCTGACCCTGCAGCCATGCAAAGAAAAAAGAACGGGAGGAAGAGCGC  
AAGAGCGGTCTCTGGAGCCCCCGGGGCAACTCAGACCGAGCGGGGTCTTGACCAAGTGGCGAGTGCCTGTTCAAGACAG  
GAGTAATCCAGCTGAAACAGGGTTTTACCCCTTCCTTTCTTCTGGTTTCCTTCCTCTGCTTCAGCGGCCTCGCCCGGAGTC  
TTGACCAGCGCAGGTTCTGACGCGACCGGTGGCATCACCGAGTTCGCTCAAGCCTCAACCTCCTTTTTCTTATTCTAGCTT  
GTCTCCGGGCGAGGGTGTTAGCCCTTGGAACCGCAGTTGGTTCCT

>CLVdToAs13/1059E (= CLVdToAs1385E)

CGGAATAAAGCTCGTGGTTCCTGTGGTTCACACCTGACCCTGCAGCCATGCAAAGAAAAAAGAACGGGAGGAAGAGCG  
CAAGAGCGGTCTCAGGAGCCCCGGGGCAACTCAGACCGAGCGGGGATCGCGACCGAGGGCGGAAGCCTGCTTCAGAC  
AGGAGTAATCCCCGTGAAACAGGGTTTTACCCCTTCCTTTCTCGGGTTTCCTTCCTCTGCTTCGCGGCCTCGCCCGGAGTC  
TTCGAATCCAGCGCAGGTTCTGACGCGACCGGTGGCATCACCGAGTTCGCTCAAGCCTCAACCTCCTTTTTCTTATTCTAGC  
CTTGGTCTCCGGGCGAGGGTGTTAGCCCTTGGAACCGCAGTTGGTTCCT

CGGAACAAACTCGTGGTTCTGTGGTTACACCTGACCCTGCAGCCATGCAAAGAAAAAAGAACGGGAGGAAGAGCG  
CAAGAGCGGTCTCAGGAGCCCCGGGGCAACTCAGACCGAGCGGGGATCGCGGACCGAGGGCGGAAGCCTGCTTCAGAC  
AGGAGTAATCCCCGCTGAAACAGGGTTTTACCCTTCTTTCTTCGGGTTTCTTCTCTGCTTGCGGCCTCGCCCGGAGTC  
TTCGAATCCAGCGCAGGTTCTGACGCGACCGTGGCATACCGAGTTGCTCAAGCCTCAACCTCCTTTTTCTATTCTACG  
CTTGGTCTCCGGGCGAGGGTGTTTAGCCCTTGAACCGCAGTTGGTTCT

CGGAACATAAACTCGTGGTTCTGTGGTTACACCTGACCCTGCAGCCATGCAAAGAAAAAAGATTGGGAGGAAGAGCG  
CAAGAGCGGTCTCAGGAGCCCCGGGGCAACTCAGACCGAGCGGGGATCGCGGACCGAGGGCGGAAGCCTGCTTCAGAC  
AGGAGTAATCCCCGCTGAAACAGGGTTTTACCCTTCTTTCTTCGGGTTTCTTCTCTGCTTGCGGCCTCGCCCGGAGTC  
TTCGAATCCAGCGCAGGTTCTGACGCGACCGGTGGCATACCGAGTTGCTCAAGCCTCATCTCTTTTTCTCTATTCTACG  
CTTGGTCTCCGGGCGAGGGTGTTTAGCCCTTGGAACCGCAGTTGGTTCT

CGGAACTAAACTCGTGGTTCTGTGGTTACACCTGACCCTGCAGCCATGCAAAGAAAAAAGAACGGGAGGAAGAGCGC  
AAGAGCGGTCTCAGGAGCCCCGGGGCAACTCAGACCGAGCGGGGATCGCGGACCGAGGGCGGAAGCCTGCTTCAGACA  
GGAGTAATCCCCGCTGAAACAGGGTTTTACCCCTTCTTTCTTCGGGTTTCTTCTCTGCTTGCGGCCTCGCCCGAGTCT  
TCGAATCCAGCGCAGGTTCTGACGCGACCGGTGGCATACCGAGTTGCTCAAGCCTATCCTCCTTTTTCTATTCTACGC  
TTGGTCTCCGGGCGAGGGTGTAGCCCTTGAACCGCAGTTGGTTCT

CGGAACTAAACTCGTGGTTCTGTGGTTACACCTGACCCTGCAGCCATGCAAAGAAAAAAGATTGGGAGGGAGAGCG  
CAAGAGCGGTCTCAGGAGCCCCGGGGCAACTCAGACCGAGCGGGGATCGCGGACCGAGGGCGGAAGCCTGCTTCTGAC  
AGGAGTANNNNNNNNNNNNNNNNNNNNNNNNNNNNNNNNNNNNNNTTCCTCTGCTTGCGGCCTCGCCC  
GGAGTCTTGAATCCAGCGCAGGTTCTGACGCGACCGGTGGCATCACCGAGTTGCTCAAGCCTCAACCTCCTTTTTCTCTA  
TTCTACGCTTGGTCTCCGGGCGAGGGTGTTAGCCCTTGAACCGCAGTTGGTTCT

CGGAACTAAACTCGTGGTTCCTGTGGTTCACACCTGACCCTGCATCCATGCAAAAGAAAAAAGATTGGGAGGAAGAGCG  
CAATACCGGTCTCATGAGCCCCGGGGCAACTCAGACCGAGCGGGGATCGCGGACCGAGGGCGGAAGCCTGCTTCTGACT  
TGAGTANNNNNNNNNNNNNNNNNNNNNNNNNNNNNNNNNNNNNNNNNNNNNNNNTTCTCTGCTTGCGGCCTCGCCG  
GAGTCTTGAATCCAGCGCAGGTTCTGACGCGACCGGTGGCATACCGAGTTGCTCAAGCCTCATCCTCCTTTTCTCTATT  
CTACGCTTGGTCTCCGGGCGAGGGGTGTTAGCCCTTGGAACCGCAGTTGGTTCCT

CGGAACTAAACTGTGGTTCCTGTGGTTACACCTGACCCTGCAGCCATGCAAAGAAAAAAGATTGGGAGGAAGAGCG  
CAAGAGCGGTCTCAGGAGCCCCGGGGCAACTCAGACCGAGCGGGGATCGCGGCCGAGGGCGGAAGCCTGCTTCTGAG  
AGGAGTANNNNNNNNNNNNNNNNNNNNNNNNNNNNNNNNNNNNNNNNTTCTCTGCTTGCGGCCTCGCCC  
GGAGTCTTGAATCCAGCGCAGGTTCTGACGCGACCGGTGGCATCACCGAGTTGCTCAAGCCTCATCTCTTTTTCTTA  
TTCTACGCTTGGTCTCCGGGCGAGGGTGTTTAGCCCTTGGAACCGCAGTTGGTTCCT

CGGAACAAACTCGTGGTTCTGTGGTTACACCTGACCCTGCAGCCATGCAAAGAAAAAAGAACGGGAGAAAGAGCG  
TAAGAGCGGTCTCAGGAGCCCGGGGCAACTCAAACCGAGCGGGGTCTTGACCAGGGGCAAGCGCCTGTTCTGACAGG  
AGTAATNNNNNNNNNNNNNNNNNNNNNNNNNNNNNNNNNNNNNNNNNNNNNTTCTTTGGTTCAGCGCCTCGCC  
CGGAGTTTTGACCAGCGCAGGTTTTGACGCGACCGGTGGCATCACCGAGTTTCGCTCAAACCTCAAATCTCTTTTTCTCA  
TTCTAGCTTGCTCCGGGCGAGGGTGTAGCCCTTGAACCGCAGTTGGTTCT

## PSTVd

>PSTVdTo1713172C

CTGGAGCGAACTGGCAATAAGGACGGTGGGGAGTGCCAGCGGCCGACAGGAGTAATCCCGCCGAAACAGGGTTTTTC  
ACCCTTCCTTTCTTCGGGTGTCCTTCCTCGCGCCCGCAGGACCACCCCTCGCCCCCTTGCGCTGTCGCTTCGGCTACT

>PSTVdTo1713158C

CTGGAGCGAACTGGCAATAAGGACGGTGGGGAGTGCCAGCGGCCGACAGGAGTAATCCCGCCAAAACAGGGTTTTTC  
ACCCTTCCTTTCTGTGGGTGTCCTTCCTCGCGCCCGCAGGTCCACCCCTCGC

>PSTVdCaSAm1302191C

GGGGAAACCTGGAGCGAACTGGCAATAAGGCGGTGGGGAGTGCCAGCGGCCGACAGGAGTAATCCCGCCGAAACAG  
GGTTTTACCCCTTCCTTTCTTCGGGTGTCCTTCCTCGCGCCCGCAGGACCACCCCTCGCCCCCTTGCGCTGTCGCTTCGGCTA  
CTACCCGGTGGAACAACCTGAAGCTCCCGAGAACCGCTTTTTCTATCTTCCTTGCTTCGGGGCGAGGGTGTTAGCCCT  
TGGAACCGCAGTTGGTTCCT

>PSTVdToEA130225C

GGGGAAACCTGGAGCGAACTGGCAATAAGGACGGTGGGGAGTGCCAGCGGCCGACAGGAGTAATCCCGCCGAAACA  
GGGTTTTACCCCTTCCTTTCTTCGGGTGTCCTTCCTCGCGCCCGCAGGACCACCCCTCGCCCCCTTGAAGCAGTCGGTTCG  
GGTAATACCCGGTGGAACAACCTGAAGCTCCCGAGAACCGCTTTTTCTATATCTTACTTTGTCGGGGCGAGGGTGTTAG  
CCC

>PSTVdToSAm130212C

CGTGGGAAACCTGGAGCGAACTGGCAAAAGGCGCGGTGGGGAGTCCCTCGCGGCCGACAGGAGTAATCCTGCTGAAA  
CAGGGTTTTACCCCTTCCTTTCTTCAGGTTTCCTTCCTCGCGCCCGCAGGATCACCCCTCGCCCCCTTGCGCTGTCGCTTCGG  
CTACTACCCGGTGGAACAACCTGAAGCTCCCGAGAACCGCTTTTTCTATATCTTGCTGGTACCGGGGCGAGGGTGTTAGC  
CCTTGGAACCGCAGTTGGTTCCT

>PSTVdToSAm130211C

AGGGGAAACCTGGAGCCAACTGTCAAAAGGCGCGGTGGGGAGAGCCTCGCGGCCGACAGGAGTAATCCAGCTGAAAC  
AGGGTTTTACCCCTTCCTTTCTTCAGGTTTCCTTCCTCGCGCCCGCAGGATCGCCCTCGCCCCCTTGCGCTGTCGCTTCGGC  
TACTACCCGGTGGAACAACCTGAACCTCCCGAGAACCGCTTTTTCTATATCTTGCTGGTACCGGGGTCGAGGGTGTTAGAC  
CTTGGAACCGCAGTTGGTTCCT

>PSTVdToEU27651C

CAACAAGGACGGTGGGGAGTGCCAGCGGCCGACAGGAGTAATCCCGCCGAAACAGGGTTTTACCCCTTCCTTCCTTCG  
GGTGTCCTTCCTCGCGCCCGCAGGACCACCCCTCGCCCCCTTGCGCTGTCGCTTCGGATACT

>PSTVdToEu27648C

CAAAAGGCGCGGTGGGAAGTGCCTCGCGGCCGACAGGAGTAATCCTGCCGAAACAGGGTTTTACCCCTTCCTTTCTCA  
GGTTTCCTTCCTCGCGCCCGCAGGATCACCCCTCGCCCCCTTGCGCTGTCGCTTCGGCTACT

>PSTVdToEA27647C

GCGGTGGGGAGTGCTCGCGACCGACAGGAGTAATCCTGCCGAAACAGGGTTTTACCCCTTCCTTTCTTCAGGTTTCCTT  
CCTCGCGCCCGCAGGATCACCCCTCGCCCCCTTGCGCTGTCGCTTCGGCTACTACCCGGTGGAACAACCT

>PTSvdToME27646C

GGGAGTGCCTCGCGGCCGACAGGAGTAATCCCGCCGAAACAGGGTTTTACCCCTTCCTTTCTTCGGGTGTCCTTCCTCGC  
GCCCCGAGGACCACCCCTCGCCCCCTTGCGCTGTCGCTTCGGTACTACCCGGGGGAAACAACCTGAAG

>PSTVd1ToME27644C

GTGCCTCGCGGACGACAGGAGTAATCCTGCCGAAACAGGGTTTTACCCCTTCCTTTCTTCAGGTTTCCTTCCTCGCGCCCG  
CAGGATCACCCCTCGCCCCCTTGCGCTGTCGCTTCGGCTACTACCCGGTGGAACAACCTGAAGC

>PSTVd2ToME27644C

CAGTGCCTAGCGGCCGACAGGAGTAATTCGCCGAAACAGGGTTTTACCCCTTCCTTCTTCGGGTGTCCTTCCTCGCGC  
CCGAGGACCACCCCTCGCCCCCTTGCGCTGTCGCTTCGGTACTACCCGGTGAAACAACGAAGCT

>PSTVdToME27642C

CTGGAGCGAACTGGCAACAAGGACGGTGGGGAGTGCCAGCGGCCGACAGGAGTAATTCGCCGAAACAGGGTTTT  
ACCCTTCCTTCTTCGGGTGTCCTTCCTCGCGCCCGCAGGACCACCCCTCGCCCCCTTGCGCTGTCGCTTCGGTACT

>PSTVdToSAm27638C

GGGATCCCCGGGAAACCTGGAGCGAACTGGCAATTAGGCGGTGGGGAGTGCCCAACGGCCGACAGGAGTAATTC  
CCGAAACAGGGTTTTACCCCTTCCTTCTTCGGGTGTCCTTCCTCGCGCCCGCAGGACCACCCCTCTC

>PSTVdToSAm27625C

CTGGAGCGAACTGGCAACAAGGACGGTGGGGAGTGCCAGCGGCCGACAGGAGTAATTCGCCGAAACAGGGTTTT  
ACCCTTCCTTTTTCTTCGGGTGTCCTTCCTCGTGCCCGCAGGACCACCCCTCGCCCCCTTGCGCTGTCGCTTCGGGTACT

>PSTVdToSAm27610C

CGGGGAAACCTGGAGCGAACTGGCAAAAGGCGCGGTGGGGAGTGCTCGCGCCGACAGGAGTAATTCCTGCTGAAAC  
AGGGTTTTACCCCTTCCTTCTTCAGGTTTCCTTCCTCGCGCCCGCAGGATACCCCTCGCCCCCTTGCGCTGTCGCTTCGGC  
TACTACCCGGTGGAACAACGAAGCTCCCGAGAACCGCTTTTCTCTATCTTGCTGGTACCGGGGCGAGGGTGTTAGCC  
CTTGGAACCGCAGTTGGTTCCTC

>PSTVdToSAs27617C

CGGTGGGGAGTGCCAGCGGCCGACAGGAGTAATTCGCCGAAACAGGGTTTTACCCCTTCCTTCTTCGGGGGTCCAT  
CCTCGCGCCCGCAGGACCACCCCTCGCCCCCTTGCGCTGTCGCTTCGGTACTACCCGGTGGAACAACGAAGCTCCCG  
AGAACCGCTTTTTCTCTATCTTACTTTGTTGGGGGCGAGGGTGTTAGCCCTTGGAACCGCAGTTGGTTCCTCGGAACTAA  
ACTCGTGTTCTGTGGTTCACACCTGACCTCCTAACAAATGCAAAGAAAAAGAGGCGGCTCGGAGGAGCGCTTCAGG  
A

>PSTVdToMC130219C

GCTTCAGTTGTTTCCCCGGGTAGTATCCGAAGCGACAGCGCAAGGGGGCGAGGGGTGATCCTGCGGGCGCGAGGAAG  
GAAACCTGAAGAAAGGAAGGGTGAAACCTGTTTCAGCAGGAATTACTCTGTGCGCCGCGAGGCACTCCCCACCGCG  
CCTTTGCCAGTTCGCTCCAGGTTTCCCCGGGGATCCACA

>PSTVdToNK12/744E

CTGGAGCGAACTGGCAATAAGGACGGTGGGGAGTGCCAGCGGCCGACAGGAGTAATTCGCCGAAACAGGGTTTT  
ACCCTTCCTTCTTCGGGTGTCCTTCCTCGCGCCCGCAGGTCCACCCCTCGCCCCCTTGCGCTGTCGCTTCGGTACT

>PSTVdToNK12/745E

CTGGAGCGAACTGGCAAAAAAGGACGGTGGGGAGTGCCAGCGGCCGACAGGAGTAATTCCTGCTGAAACAGGGTTTT  
CACCTTCCTTCTTCAGGTTTCCTTCCTCGCGCCCGCAGGTCCACCCCTCGCCCCCTTGCGCTGTCGCTTCGGTACT

>PSTVdToNK12/820E

CTGGAGCGAACTGGCAAAAGGCGCGGTGGGGAGTGCTCGCGCCGACAGGAGTAATTCCTGCCGAAACAGGGTTTT  
ACCCTTCCTTCTTCAGGTTTCCTTCCTCGCGCCCGCAGGATACCCCTCGCCCCCTTGCGCTGTCGCTTCGGTACT

>PSTVdToNK13/020E

CTGGAGCGAACTGGCAAAAAAGGACGGTGGGGAGTGCCAGCGGCCGACAGGAGTAATTCCTGCTGAAACAGGGTTTT  
CACCTTCCTTCTTCAGGTTTCCTTCCTCGCGCCCGCAGGTCCACCCCTCGCCCCCTTGCGCTGTCGCTTCGGTACT

>PSTVdCaEu13/102E

CTGGAGCGAACTGGCAAAAAAGGACGGTGGGGAGTGCCAGCGGCCGACAGGAGTAATTCCTGCTGAAACAGGGTTTT  
CACCTTCCTTCTTCAGGTTTCCTTCCTCGCGCCCGCAGGTCCACCCCTCGCCCCCTTGCGCTGTCGCTTCGGTACT

>PSTVdToNK13/567E

CTGGAGCGAACTGGCAAAAAAGGACGGTGGGGAGTGCCAGCGGCCGACAGGAGTAATTCCTGCTGAAACAGGGTTTT  
CACCTTCCTTCTTCAGGTTTCCTTCCTCGCGCCCGCAGGTCCACCCCTCGCCCCCTTGCGCTGTCGCTTCGGTACT

>PSTVdToEAs13/161E (=PSTVdToEA1291E)

ATCCCCGGGGAAACCTGGAGCGAACTGGCAATAAGGACGGTGGGGAGTGCCAGCGGCCGACAGGAGTAATTCCCGCC  
GAAACAGGGTTTTACCCCTTCTTTCTCGGGTGTCTTCTCGCGCCCGCAGGACCACCCCTCGCCCCCTTTCGCTGTCTG  
CTTCGGCTACTACCCGGTGGAAACAACTGAAGCTCCCGAGAACCCTTTTTCTATCTTTCTTTCGCTCGGGGCGAGGGT  
GTTTAGCCCTTGAACCGCAGTTGGTTCTCGGAACTAACTCGTGGTTCCTGTGGTTCACACCTGACCTCTGAGCAGAA  
AAGAAAAAGAAGGCGGCTCGGAGGAGCGCTTCAGGG

>PSTVdToME13/187E

AGCTTCAGTTGTTTCCACCGGGTAGTAGCCGAAGCGACAGCGCAAGGGGGCGAGGGGTGATCCTGCGGGCGCGAGGAA  
GGAAACCTGAAGAAAGGAAGGGTGAACCCCTGTTTCGGCAGGAATTACTCCTGTGCGCCGCGAGGCACTCCCCACCGC  
GCCTTTTGCCAGTTCGCTCCAGGTTTCCCCGGGGATCCC

>PSTVdToME13/818E

CTGGAGCGAACTGGCAAAAGGCGCGGTGGGGAGTGCCTCGCGGCCGACAGGAGTAATTCCTGCCGAAACAGGGTTTTTC  
ACCCTTCCTTTCTTCAGGTTTCTTCTCGCGCCCGCAGGATCACCCCTCGCCCCCTTTCGCTGTCTGCTTCGGCTACT

>PSTVdToEAs13/942E

CTGGAGCGAACGGCAATAAGGACGGTGGGGAGTGCCAGCGGCCGACAGGAGTAATTCGCCGAAACAGGGTTTTCA  
CCCTTCCTTTCTTCGGGTGTCTTCTCGCGCCCGCAGGACCACCCCTCGCCCCCTTTCGCTGTCTGCTTCGGCTACT

>PSTVdTOEu13/967E

CTGGAGCGAACTGGCAAAAGGCGCGGTGGGGAGTGCCTCGCGGCCGACAGGAGTAATTCCTGCCGAAACAGGGTTTTTC  
ACCCTTCCTTTCTTCAGGTTTCTTCTCGCGCCCGCAGGATCACCCCTCGCCCCCTTTCGCTGTCTGCTTCGGCTACT

>PSTVdToNK13/1046E

CTGGAGCGAACTGGCAAAAGGCGCGGTGGGGAGTGCCTCGCGGCCGACAGGAGTAATTCCTGCCGAAACAGGGTTTTTC  
ACCCTTCCTTTCTTCAGGTTTCTTCTCGCGCCCGCAGGATCACCCCTCGCCCCCTTGGACTGTCTGCTTCGTCTACT

>PSTVdToNK13/1051E

CTGGAGCGAACTGGCAAAAGGCGCGGTGGGGAGTGCCTCGCGGCCGACAGGAGTAATTCCTGCCGAAACAGGGTTTTTC  
ACCCTTCCTTTCTTCAGGTTTCTTCTCGCGCCCGCAGGATCACCCCTCGCCCCCTTTCGCTGTCTGCTTCGGCTACT

>PSTVdToAs13/1070E

CTGGAGCGAACTGGCAAAAGGCGCGGTGGGGAGTGCCTCGCGGCCGACAGGAGTAATTCCTGCCGAAACAGGGTTTTTC  
ACCCTTCCTTTCTTCAGGTTTCTTCTCGCGCCCGCAGGATCACCCCTCGCCCCCTTTCGCTGTCTGCTTCGGCTACT

>PSTVdToNK13/1100E

CTGGAGCGAACTGGCAAAAGGCGCGGTGGGGAGTGCCTCGCGGCCGACAGGAGTAATTCCTGCCGAAACAGGGTTTTTC  
ACCCTTCCTTTCTTCAGGTTTCTTCTCGCGCCCGCAGGATCACCCCTCGCCCCCTTTCGCTGTCTGCTTCGGCTACT

>PSTVdToNK13/1104E

CTGGAGCGAACTGGCAAAAGGCGCGGTGGGGAGTGCCTCGCGGCCGACAGGAGTAATTCCTGCCGAAACAGGGTTTTTC  
ACCCTTCCTTTCTTCAGGTTTCTTCTCGCGCCCGCAGGATCACCCCTCGCCCCCTTTCGCTGTCTGCTTCGGCTACT

>PSTVdToNam13/1206E

CTGGAGCGAACTGGCAAAAGGCGCGGTGGGGAGTGCCTCGCGGCCGACAGGAGTAATTCCTGCCGAAACAGGGTTTTTC  
ACCCTTCCTTTCTTCAGGTTTCTTCTCGCGCCCGCAGGATCACCCCTCGCCCCCTTTCGCTGTCTGCTTCGGCTACT

>PSTVdCaNam14/675E

CTGGAGCGAACTGGCAATAAGGACGGTGGGGAGTGCCAGCGGCCGACAGGAGTAATTCGCCGAAACAGGGTTTTTC  
ACCCTTCCTTTCTTCGGGTGTCTTCTCGCGCCCGCAGGTCCACCCCTCGCCCCCTTTCGCTGTCTGCTTCGGCTACT

>PSTVdCaNam14/627E

CTGGAGCGAACTGGCAATAAGGACGGTGGGGAGTGCCAGCGGCCGACAGGAGTAATTCGCCGAAACAGGGTTTTTC  
ACCCTTCCTTTCTTCGGGTGTCTTCTCGCGCCCGCAGGTCCACCCCTCGCCCCCTTTCGCTGTCTGCTTCGGCTACT

>PSTVdCaNam14/836E

CTGGAGCGAACTGGCAATAAGGACGGTGGGGAGTGCCAGCGGCCGACAGGAGTAATCCCGCCGAAACAGGGTTTTTC  
ACCCTTCCTTTCTTCGGGTGTCCTCCTCGCGCCCGCAGGACCACCCCTCGCCCCCTTTCGCTGTCGCTTCGGCTACT

>PSTVdCaNA15/1046E

CTGGAGCGAACTGGCAATAAGGACGGTGGGGAGTGCCAGCGGCCGACAGGAGTAATCCCGCCGAAACAGGGTTTTTC  
ACCCTTCCTTTCTTCGGGTGTCCTCCTCGCGCCCGCAGGTCCACCCCTCGCCCCCTTTCGCTGTCGCTTCGGCTACT

>PSTVdToNK12/868E

CTGGAGTGAAGTGGCAAAAAAGGACGGTGGGGAGTGCCAGCGGCCGACAGGAGTAATCCTGCTGAAACAGGGTTTTT  
CACCTTCCTTTCTTCAGGTTTCCTCCTCGCGCCCGCAGGTCCACCCCTCGCCCCCTTTCGCTGTCGCTTCGGCTACT

>PSTVdToEu13/101bE

GGGTAGTGCCAGCGGCCGACAGGAGTAATCCTGCTGAAACAGGGTTTTTCACCTTCCTTTCTTCAGGTTTCCTTCCTCG  
CGCCCGCAGGTCCACCCCTCGCCCCCTTTCGCTGTCGCTTCGGCTACTACCCGGTGGATACAACCTGAAGCT

>PSTVdCaAf13/124E

CTGGAGCGAACTGGCAATAAGGACGGTGGGGAGTGCCAGCGGCCGACAGGAGTAATCCCGCCGAAACAGGGTTTTTC  
ACCCTTCCTTTCTTCGGGTGTCCTCCTCGCGCCCGCAGGACCACCCCTCGCCCCCTTTCGCTGTCGCTTCGGCTACT

>PSTVdToNK13/1205E

CTGGAGCGATCTGGCAAAAAAGGGCGGTGGGGAGCGGCCAGCGGCCGACAGGAGTAATTCGTGCTGAAACAGGGTTTTT  
CACCTTCCTTTCTTCAAGTTTCCTCCTCACGCCCGCAGGTCCACCCCTCGCCCCCTTTCGCTGTCGCTTCGGCTACT

## PCFVd

>KC762953.1 Pepper chat fruit viroid isolate EMA12/759, complete genome

CCGGATTCTTCTAAGGGTGCCTGTGGTGCCTCCCCGAAGCCCGCTTAGGGAAAAAGAAAGGGGAAGCAA  
GCATCTCCTGTTTCAGGGATCCCCGGGGAAACCTGGACAGACCGGGCGGAGAAGCGCACGAGCGGGACCGT  
CTTCTGACAGGAGTAATCCCGCTGAAACAGGGTTTTACCTTCCTTTCTTCGGGTTTCCTTCCTCAGT  
CGACCGGTCCGCGTCGGCCTTCTCGCGCACTGCTGTCCGGCTACTACCCGGTGGATACAACCTGACAGAGG  
TGCTTTTCTTCCACCCGACTTCTACCGACGCGGCCGGGAGTGAAGCTACCCGGGACCCGAGAGGATCT

>KC762954.1 Pepper chat fruit viroid isolate EMA12/761, complete genome

CCGGATTCTTCTAAGGGTGCCTGTGGTGCCTCCCCGAAGCCCGCTTAGGGAAAAAGAAAGGGGAAGCAA  
GCATCTCCTGTTTCAGGGATCCCCGGGGAAACCTGGACAGACCGGGCGGATAAGCGCACGAGCGGGACCGT  
CTTCTGACAGGAGTAATCCCGCTGAAACAGGGTTTTACCTTCCTTTCTTCGGGTTTCCTTCCTCAGT  
CGACCGGTCCGCGTCGGCCTTCTCGCGCACTGCTGTCCGGCTACTACCCGGTGGATACAACCTGACAGAGG  
TGCTTTTCTTCCACCCGACTTCTACCGACGCGGCCGGGAGTGAAGCTACCCGGGACCCGAGAGGATCT

>KC762952.1 Pepper chat fruit viroid isolate EMA12/80420, complete genome

CCGGATTCTTCTAAGGGTGCCTGTGGTGCCTCCCCGAAGCCCGCTTAGGGAAAAAGAAAGGGGAAGCAA  
GCATCTCCTGTTTCAGGGATCCCCGGGGAAACCTGGACAGACCGGGCGGAGAAGCGCACGAGCGGGACCGT  
CTTCTGACAGGAGTAATCCCGCTGAAACAGGGTTTTACCTTCCTTTCTTCGGGTTTCCTTCCTCAGT  
CGACCGGTCCGCGTCGGCCTTCTCGCGCACTGCTGTCCGGCTACTACCCGGTGGATACAACCTGACAGAGG  
TGCTTTTCTTCCACCCAACCTTCTACCGACGCGGCCGGGAGTGAAGCTACCCGGGACCCGAGAGGATCT

>PCFVdToME13/159E

CCGGATTCTTCTAAGGGTGCCTGTGGTGCCTCCCCGAAGCCCGCTTAGGGAAAAAGAAAGGGGAAGCAAGCATCTCCT  
GTTTCAGGGATCCCCGGGGAAACCTGGACAGACCGGGCGGAGAAGCGCACGAGCGGGACCGTCTTCTGACAGGAGTAAT  
CCCCGCTGAAACAGGGTTTTACCTTCCTTTCTTCGGGTTTCCTTCCTCAGTTGACCGGTCCGCGTCGGCCTTCTCGCGCA  
CTGCTGTCCGGCTACTACCCGGTGGATACAACCTGACAGAGGTGCTTTTTCTTCCACCCGACTTCTACCGACGCGGCCGGGA  
GTGAAGCTACCCGGGACCCGAGAGGATCT

>PCFVdToNA13/968E

CCGGATTCTTCTAAGGGTGCCTGTGGTGCCTCCCCGAAGCCCGCTTAGGGAAAAAGAAAGGGGAAGCAAGCATCTCCT  
GTTTCAGGGATCCCCGGGGAAACCTGGACAGACCGGGCGGAGAAGCGCACGAGCGGGACCGTCTTCTGACAGGAGTAAT

>PCFVdToAs13/1072E

>PCFVdCaNK13/1127E

>PCFVdCaNK13/1192E

>PCFVdToNK13/1170E

>PCFVdToEu13/1252E

>PCFVdCaEAs13/1317E

>PCFVdToME14/0008E

>PCFVdToNAm14/601E

>PCFVdCaNAm14/628E

>PCFVdToNAm14/675E

CTGGACAGACCGGGCGGAGAAGCGCACGAGCGGGACCGTCTTCTGACAGGAGTAATCCCCGCTGAAACAGGGTTTTAC  
CCTTCCTTTCTTCGGGTTTCTTCTCAGTCGACCGGTCCGCGTCGGCCTTCTCGCGCACTGCTGTCCGGCTACT

CTGGACAGACCGGGCGGAGAAGCGCACGAGCGGGACCGTCTTCTGACAGGAGTAATCCCCGCTGAAACAGGGATTCTC  
CCTTCCTTTCTTGGGTTTCTTCTCAGTCAACCGGTCCGCGTCGGCCTTCTCGCGCACTGCTGTCCGGCTACT

CTGGACAGACCGGGCGGAGAAGCGCACGAGCGGGACCGTCTTCTGACAGGAGTAATCCCCGCTGAAACAGGGTTTTAC  
CCTTCTTTCTTGGGTTTTCTTCTCAGTCGACCGGTCCGCGTCGGCCTTCTCGCGCACTGCTGTCCGGCTACT

CTGGACAGACCGGGCGGAGAAGCGCACGAGCGGGACCGTCTTCTGACAGGAGTAATCCCCGCTGAAACAGGGTTTTAC  
CCTTCTTTCTTGGGTTTTCTTCTCAGTCGACCGGTCCGCGTCGGCCTTCTCGCGCACTGCTGTCCGGCTACT

CTGGACAGACCGGGCGGAGAAGCGCACGAGCGGGACCGTCTTCTGACAGGAGTAATCCCCGCTGAAACAGGGATTTAC  
CCTTCCTTCTTCGGGTTTCTTCTCAGTCGACCGGTCCGCGTCGGCCTTCTCGCGCACTGCTGTCCGGCTACT

CTGGACAGACCGGGCGGAGAAGCGCACGAGCGGGACCGTCTTCTGACAGGAGTAATCCCCGCTGAAACAGGGTTTTAC  
CCTTCCTTCTTCGGGTTTCTTCTCAGTCGACCGGTCCGCGTCGGCCTTCTCGCGCACTGCTGTCCGGCTACT

CTGGACAGACCGGGCGGAGAAGCGCACGAGCGGGACCGTCTTCTGACAGGAGTAATCCCCGCTGAAACAGGGTTTTTAC  
CCTTCCTTCTTCGGGTTTCCTTCTCAGTCGACCGGTCCGCGTCGGCCTTCTCGCGCACTGCTGTCCGGCTACT

CTGAACAGATCGGGCGGAGAAGCGCCGTGCGGGTCCGTCTTCTGACAGGAGTAATCCCCGCTGAAACAGGGTTTTACC  
CTTCCTTTCTTCGGGTTTCCTTCCTCAGGCGACCGGACCGCGTCGGCCTTCTCGCGCACTTCTGTTGGAGACT

CTGGACAGACCGGGCGGAGAAGCGCACGAGCGGGACCGTCTTCTGACAGGAGTAATCCCCGCTGAAACAGGGATTCTC  
CCTTCCTTCTTCGGGTTTCCTTCTCAGTCGACCGGTCCGCGTCGGCCTTCTCGCGCACTGCTGTCCGGCTACT

CTGAACAGATCGGGCGGAGAAGCGCCGTGCGGGTCCGTCTTCTGACAGGAGTAATCCCCGCTGAAACAGGGTTTTACC  
CTTCCTTTCTTCGGGTTTCCTTCCTCAGTCGACCGGACCGCGTCGGCCTTCTCGCGCACTTCTGTTCGGAGACT

CTGGAGCGAACTGGCAATAAGGACGGTGGGGAGTGCCCAGCGGCCGACAGGAGTAATTCCGCCGAAACAGGGTTTTT  
ACCTTCTCTTCTCGGGTGTCTTCTCGCGCCCGCAGGTCCACCCCTCGCCCCCTTTCGCTGTGCTTCTGGCTACT

[illegible]



## CEVd

>CEVdToEu27649

GCTGCTTCGGTCGCCGCGGATCACTGGCGTCCAGCGGAGAAACAGGAGCTCGTCTCCTTCCTTTGCTGCTGGCTCCACAT  
CCGATCGTCGCTGAAGCGCCACGCCCCCTCGCCGGAGCTTCTCTGAGACTACCCGGTGAAACAACCTGAAGCTTCT  
CTCTGGAGACTACCCGGTGAAACAACCTGAAGC

>CEVdToEu13/009E

CTGGAGGAAGTCGAGGTCGGGGGGGAACAGCTGCTTCGGTCGCCGCGGATCCCTGGCGTCCAGCGGAGAAACAGGAGC  
TCGTCTCCTTCCTTTGCTGCTGGCTCCACATCCGATCGTCGCTGAAGCGCCACGCCCCCTCGCCGGAGCTTCTCTGGA  
GACT

>CEVdToNK13/020E

CTGGAGGAAGTCGAGGTCGGGGGGGAACAGCTGCTTCGGTCGCCGCGGATCCCTGGCGTCCAGCGGAGAAACAGGAGC  
TCGTCTCCTTCCTTTGCTGCTGGCTCCACATCCGATCGTCGCTGAAGCGCCACGCCCCCTCGCCGGAGCTTCTCTGGA  
GACT

>CEVdToSAm13/008E

CTGGAGGAAGTCGAGGTCGGGGGGGAACAGCTGCTTCGGTCGCCGCGGATCCCTGGCGTCCAGCGGAGAAACAGGAGC  
TCGTCTCCTTCCTTTGCTGCTGGCTCCACATCCGATCGTCGCTGAAGCGCCACGCCCCCTCGCCGGAGCTTCTCTGGA  
GACT

>CEVdToNK13/042E

CTGGAGGAAGTCGAGGTCGGGGGGGAACAGCTGCTTCGGTCGCCGCGGATCACTGGCGTCCAGCGGAGAAACAGGAGC  
TCGTCTCCTTCCTTTGCTGCTGGCTCCACATCCGATCGTCGCTGAAGCGCCACGCCCCCTCGCCGGAGCTTCTCTGGA  
GACT

>CEVdToNK13/45E

CTGGAGGAAGTCGAGGTCGGGGGGGAACAGCTGCTTCGGTCGCCGCGGATCCCTGGCGTCCAGCGGAGAAACAGGAGC  
TCGTCTCCTTCCTTTGCTGCTGGCTCCACATCCGATCGTCGCTGAAGCGCCACGCCCCCTCGCCGGAGCTTCTCTGGA  
GACT

>CEVdCaEu13/74Be

CTGGAGGAAGTCGAGGTCGGGGGGGAACAGCTGCTTCGGTCGCCGCGGATCACTGGCGTCCAGCGGAGAAACAGGAGC  
TCGTCTCCTTCCTTTGCTGCTGGCTCCACATCCGATCGTCGCTGAAGCGCCACGCCCCCTCGCCGGAGCTTCTCTGGC  
TACT

>CEVdToNK13/019E

CTGGAGGAAGTCGAGGTCGGGGGGGAACAGCTGCTTCGGTCGCCGCGGATCCCTGGCGTCCAGCGGAGAAACAGGAGC  
TCGTCTCCTTCCTTTGCTGCTGGCTCCACATCCGATCGTCGCTGAAGCGCCACGCCCCCTCGCCGGAGCTTCTCTGGA  
GACT

>CEVdToEu13/044E

CTGGAGGAAGTCGAGGTCGGGGGGGAACAGCTGATTTCGGTCGCCGCGGATCCCTGGCGTCCAGCGGAGAAACAGGAGC  
TCGTCTCCTTCCTTTGCTGCTGGCTCCACATCCGATCGTCGCTGAAGCGCCACGCCCCCTCGCCGGAGCTTCTCTGGA  
GACT

>CEVdToEu13/046E

CTGGAGGAAGTCGAGGTCGGGGGGGAACAGCTGCTTCGGTCGCCGCGGATCCCTGGCGTCCAGCGGAGAAACGGGAGC  
TCGTCTCCTTCCTTTGCTGCTGGCTCCACATCCGATCGTCGCTGAAGCGCCACTCCCCCTCGCCGGAGCTTCTCTGGA  
GACT

>CEVdCaEu13/102E

CTGGAGGAAGTCGAGGTCGGGGGGGAACAGCTGCTTCGGTCGCCGCGGATCCCTGGCGTCCAGCGGAGAAACAGGAGC  
TCGTCTCCTTCCTTTGCTGCTGGCTCCACATCCGATCGTCGCTGAAGCGCCACGCCCCCTCGCCGGAGCTTCTCTGGA  
GACT

CTGGAGGAAGTCGAGGTCGGGGGGGAACAGCTGCTTCGGTCGCCGCGGATCACTGGCGTCCAGCGGAGAAAACAGGAGC  
TCGTCTCCTTCCTTTCGCTGCTGGCTCCACATCCGATCGTCGCTGAAGCGCCACGCCCCCTCGCCCGGAGCTTCTCTCTGGA  
GACT

CTGGAGGAAGTCGAGGTCGGGGGGGAACAGCTGCTTCGGTCGCCGCGGATCCCTGGCGTCCAGCGGAGAAAACGGGAGC  
TCGTCTCCTTCCTTCGCTGCTGGCTCCACATCCGATCGTCGCTGAAGCGCCACTCCCCCTCGCCCGAGCTTCTCTCTGGA  
GACT

CAGGAGGAAGTCGAGGTCGGGGGGGAACAGCTGCTTCGGTGCGCCGCGGATCCCTGGCGTCCAGCGGAGAAACAGGAGC  
TCGTCTCCTTCCTTCTCTGCTGGCTCCTCATCCGATCGTCGCTGAAGCGCCACGCCCCCTCGCCGGAGCTTCTCTCTGGA  
GACT

CTGGAGGAAGTCGAGGACGGGGGCTCGGAAGATGCGGTCGCCGCGGATCACTGGCGTCCAGCGGAGAAACAGGAGCT  
CGACTCCTTCCTTTCGCTGCTGGCTCCACATCCGATCGTCGCTGCAGTCTCTTGACCCCTCGCCCGGAGCTTCTCTCTGGCT  
ACT

CATCAAGAAAAAGATAGGCGCGGGAGCGAAGAAGTCCTTCAGGGATCCCCGGGGAAACCCGAAGGAAGTCGAGGAC  
GGGGGCTTCCGACTACTCCCGTGTGAGACAGGAGTAATCCCAGCTGAAACAGGGTTTTACCCCTTCTTTCTTCTGGTTTC  
CTTCTCTCGCTGGAGAGGTCTTCGCCCTCGCCGGAGCTTCTCTTAGGAGACTACCGGTGGATACAACTGAAGCTTC  
AACCTCCACGCGCTTTTTCTATCTTTGTTGCTCTCCGGGCGAGGGTGAAAGCCCGTGGAACCCCTACTAAGAGTCCCT

CATCAAGAAAAAGATAGGCGCGGGAGCGAAGAAGTCCTTCAGGGATCCCCGGGGAAACCCGAAGGAAGTCGAGGAC  
GGGGGCTTCCGACTACTCCCGTGTGAGACAGGAGTAATCCCAGCTGAAACAGGGTTTTACCCTTCTTTCTTCTGGTTTC  
CTTCTCTCGCCTGGAGAGGTCTTCGCCCTCGCCCGGAGCTTCTCTTAGGAGACTACCCGGTGGATACAACTGAAGCTTC  
AACCTCTCGCGCTTTTTCTCTATCTTTGTTGCTCTCGGGCGAGGGTGAAAGCCCGTGGAACCCTAGTAAGAGTCCCT

GAACAGGAGTAATCCCAGAGAAACAGGGTTTTACCCCTTCCTTCTGATTTCGGTTTCCTTCTTCCTTGC

GGGGAAACCTGGAGCGAACTGGCAAAGGCGGCAGGGAGCTTGTGGAAGGCGAAACAGGAGTAATCCCGAGAGAAAC  
AGGGTTTTACCCCTTCTTTCTGATTCGGTTTCTTCTTTGCGCGCACTCGACCCTCGCCCCCTTGCCTGTGCTTCGG  
CAACTACCCGGTGGAACAACCTGAAGCTCCGAGAACCGCTTTTTCTCTATCTTGCTGCTACCGGGGCGAGGGTGTTAGC  
CCTTGGAACCGCAGTTGGTTCCTCGAACTAAACTCGTGGTTCCTGTGGTTCACACCTGACCTCCTGTGCAGAAAAGAAAA  
AAGATAGGCGGCTCGGAGGAGCGCTTCAGGATAGGCCATGT

>TCDVdTaf130221C

AGGCGAAACAGGAGTAATCCCGAGAGAAAcAGGGATTTACCCTTCCTTTCTGATTGCGTTTCCTTCCTTTGCGTGCCACT  
CGACCCCTCGCCCCCTTGCCTGTCGCTTCGGGAACTACCCGGTGGAACAACCTGAAGCTCCCGAGAACCGCTTTTCTCT  
ATCTTGATGCTACCGGGGCGAGGGTGTTTAGCCCTTGGAACCGCAGTTGGTTCCTCGGAATAAAGCTGTGTCTCCTGTG  
GTTGAGACCTGACCTCCTGTGCATAAAAGAAAAAAGATAGGCGGCTCG

>TCDVdToSam130225C

GGCGAGGGGTCGAGTGCGCGCAAAGGAAGGAAACCGAATCAGAAAGGAAGGGTGAAAACCTGTTTCTCTCGGGATT  
ACTCCTGTTTCGCCTTCCACAAGCTCCCTGCCGCCTTTGCCAGTTCGCTCCAGGTTTCCCCGGGGATCCC

>TCDVdToEuMC27648C

GCTTGTGGAGGCGAaACAGGAGTAATCCCGAGAGAAACAGGGTTTTACCCTTCCTTTCTGATTGCGTTTCCTTCCTTTGC  
GCGCCACTCGACCCCTCGCCCCCTTGCCTGTCGCTTCGGCAACTACCCGGGGGAAACAACCTGAAGC

>TCDVdToMEMC27642C

ATCCCGGGGAAACCTGGAGCGAACTGGCAAAAGGCGGCAGGGAGCTTGGAAGGCGAAACAGGAGTAATCCCGAG  
AGAAACAGGGTTTTACCCTTCCTTTCTGATTGCGTTTCCTTCCTTTGCGCGCCACTCGACCCCTCGCCCCCTTGCCTGTCG  
CTTCGGCAACTACCCGGTGGAACAACCTGAAGCTCCCGAGAACCGCTTTTCTCTATCTTGCTGCTACCGGGGCGAGGGT  
GTTTAGCCCTTGGAACCGCAGTTGGTTCCTCGGAATAAAGCTGTGGTTCCTGTGGTTCACACCTGACCTCCTGTGCAGAA  
AAGAAAAAAGATAGGCGGCTCGGAGGAGCGCTTCAGG

>TCDVdToEu276\_34C

TCAGGGATTCCCGGGGAAACCTGGAGCGAACTGGCAAAAGGCGGCAGGGAGCTGGTGGAAGGCGAAACAGGAGTAAT  
CCCGAGAGAAACAGGGTTTTACCCTTCCTTTCTGATTGCGTTTCCTTCCTTTGCGCGCCACTCGACCCCTCGCCCCCTTGC  
GCGGTGGTTGCGTAACTACCCGGTGGAACAACCTGAAGCT

>TCDVdToEu27618C

CTTGTGGAAGGCGAAACAGGAGTAATCCCGAGAGAAACAGGGTTTTACCCTTCCTTTCTGATTGCGTTTCCTTCCTTTGC  
GCGCCACTCGACCCCTCGCCCCCTTGCCTGACGGTTCGGCAACTACCCGGTGGAACAACCTGAAGCTCCCGAGAACCGC  
TTTTCTCTATCTTGCTGCTACCGGGGCGAGGGTGTTTAGCCCTTGGAACCGCAGTTGGTTCCTCGGAATAAAGCTGTGG  
TTCCTGTGGTTCACACCTGACCTCCTGTGCAGAAAAGAAAAAAGATAGGCGGCTCGGAGGAGCGCTTCAGG

>TCDVdToNam13593C

ATAACATGGGGATCCCGGGGAAACCTGGAGCGAACTGGCAAAAGGCGGCAGGGAGCTTGGAAGGCGAAACAGGA  
GTAAGCCCGCGAGAAACAGGGTTTTACCCTTCCTTTCTGACGCGGCTTCCTTCCTTTGCGCGCCACTCGACCCCTCGCCCC  
CTTGCGCTGTCGCTTCGGCTACTACCCGGGGGATACAACCTGAAGCAAACAGTTGTTA
