# Supplementary material for: Viroid-infected Tomato and Capsicum Seed Shipments to Australia
Source: MDPI journal article supplement (doi:10.3390/v11020098), 2019-01-24
Supplement: s1 [file s1]

## Supplementary file 2. Isolates with identical sequences obtained from different seed lots.

This supplementary file provides alignments of viroid sequences obtained from different seed lots which were identified as being 100% identical to each other or nearly identical.

### Methods

All sequences of the same viroid species were aligned and compared using MEGA7 to identify identical sequences. Sequences of any length were selected as long as they were of sufficient quality for analysis. Multiple alignments were made using the MUSCLE program running with the default parameters. The evolutionary distances were computed in MEGA7 using default parameters. To confirm and visualise the extent of the sequence similarity, identical isolates were re-aligned using CLUSTAL OMEGA. The GenBank non-redundant nucleotide sequence database was searched for matches to the sequences by using the blastn (BLAST nucleotide) program. All the BLASTN matches reported in this document covered 100% of the query sequences, excluding any unresolved nucleotide positions ('N').

### References

- Altschul, G.F.; Gish, W.; Miller, W.; Myers, E.W.; Lipman, D.J. Basic local alignment search tool. *J. Mol. Biol.* **1990**, *215*, 403–410.
- Edgar, R.C. MUSCLE: multiple sequence alignment with high accuracy and high throughput. *Nucleic Acids Res.* 2004, *32*, 1792–1797.
- Katoh, K.; Standley, D.M. MAFFT Multiple Sequence Alignment Software Version 7: Improvements in Performance and Usability. *Mol. Biol. Evol.* 2013, *30*, 772–80.
- Li, W.; Cowley, A.; Uludag, M.; Gur, T.; McWilliam, H.; Squizzato, S.; Park, Y.M.; Buso, B.; Lopez, R. The EMBL-EBI bioinformatics web and programmatic tools framework. *Nucleic Acids Res.* **2015**, *43*, W580–W584, doi:10.1093/nar/gkv279.
- Sievers, F.; Wilm, A.; Dineen, D.; Gibson, T. J.; Karplus, K.; Li, W.; Lopez, R.; McWilliam, H.; Remmert, M.; Söding, J.; Thompson, J. D.; Higgins, D.G. Fast, scalable generation of high-quality protein multiple sequence alignments using Clustal Omega. *Mol. Syst. Biol.* 2011, *7*, 539. doi:10.1038/msb.2011.75
- Blast searches of GenBank: <https://blast.ncbi.nlm.nih.gov/Blast.cgi>
- CLUSTAL OMEGA: <https://www.ebi.ac.uk/Tools/msa/clustalo/>
- MAFFT alignments: <https://mafft.cbrc.jp/alignment/server/>

Isolates from seed lots were named using the following convention: viroid species, host, location, submission reference number and first initial of testing laboratory:

Host: Ca= Capsicum; To = Tomato,

Region: Af = Africa; As = Asia; Eu = Europe; EA – east Asia; ME = middle east; NAm = North America;

NK = region not known; SAm = South America; SAs – South Asia

Lab: C=CHS; E = EAMI

**Figure S6.** Identical PSTVd sequences obtained from different seed lots. PSTVdToNK12/744E, PSTVdCaNam14/675E, PSTVdCaNam14/627E and PSTVdCaNam15/1046E are identical; they have 100% nucleotide identity to the Chinese Potato spindle tuber viroid isolate ODN (KR611362) and others.

|                    |                                                              |     |
|--------------------|--------------------------------------------------------------|-----|
| PSTVdToNK12/744E   | CTGGAGCGAACTGGCAATAAGGACGGTGGGGAGTGCCAGCGGCCGACAGGAGTAATTCC  | 60  |
| PSTVdCaNam14/675E  | CTGGAGCGAACTGGCAATAAGGACGGTGGGGAGTGCCAGCGGCCGACAGGAGTAATTCC  | 60  |
| PSTVdCaNam14/627E  | CTGGAGCGAACTGGCAATAAGGACGGTGGGGAGTGCCAGCGGCCGACAGGAGTAATTCC  | 60  |
| PSTVdCaNam15/1046E | CTGGAGCGAACTGGCAATAAGGACGGTGGGGAGTGCCAGCGGCCGACAGGAGTAATTCC  | 60  |
|                    | *****                                                        |     |
| PSTVdToNK12/744E   | CGCCGAAACAGGGTTTTACCCCTTCCTTTCTTCGGGTGTCCTTCCTCGCGCCCGCAGGTC | 120 |
| PSTVdCaNam14/675E  | CGCCGAAACAGGGTTTTACCCCTTCCTTTCTTCGGGTGTCCTTCCTCGCGCCCGCAGGTC | 120 |
| PSTVdCaNam14/627E  | CGCCGAAACAGGGTTTTACCCCTTCCTTTCTTCGGGTGTCCTTCCTCGCGCCCGCAGGTC | 120 |
| PSTVdCaNam15/1046E | CGCCGAAACAGGGTTTTACCCCTTCCTTTCTTCGGGTGTCCTTCCTCGCGCCCGCAGGTC | 120 |
|                    | *****                                                        |     |
| PSTVdToNK12/744E   | CACCCCTCGCCCCCTTTGCGCTGTCGCTTCGGCTAC-                        | 156 |
| PSTVdCaNam14/675E  | CACCCCTCGCCCCCTTTGCGCTGTCGCTTCGGCTACT                        | 157 |
| PSTVdCaNam14/627E  | CACCCCTCGCCCCCTTTGCGCTGTCGCTTCGGCTACT                        | 157 |
| PSTVdCaNam15/1046E | CACCCCTCGCCCCCTTTGCGCTGTCGCTTCGGCTACT                        | 157 |
|                    | *****                                                        |     |

**Figure S7.** PSTVd sequences obtained from different seed lots. PSTVdToNK13/567E, PSTVdCaEu13/102E, PSTVdToNK12/868E and PSTVdToNK13/020E are identical and were found to have 98% nucleotide identity to the Polish experimental isolate Potato spindle tuber viroid isolate S7 (AY492081).

|                   |                                                               |     |
|-------------------|---------------------------------------------------------------|-----|
| PSTVdToEu13/101bE | -----GGGTAGTGCCAGCGGCCGACAGGAGTAATTCC                         | 32  |
| PSTVdToNK12/868E  | CTGGAGTGAACTGGCAAAAAAGGACGGTGGGGAGTGCCAGCGGCCGACAGGAGTAATTCC  | 60  |
| PSTVdToNK13/567E  | CTGGAGCGAACTGGCAAAAAAGGACGGTGGGGAGTGCCAGCGGCCGACAGGAGTAATTCC  | 60  |
| PSTVdCaEu13/102E  | CTGGAGCGAACTGGCAAAAAAGGACGGTGGGGAGTGCCAGCGGCCGACAGGAGTAATTCC  | 60  |
| PSTVdToNK13/020E  | CTGGAGCGAACTGGCAAAAAAGGACGGTGGGGAGTGCCAGCGGCCGACAGGAGTAATTCC  | 60  |
|                   | *** *****                                                     |     |
| PSTVdToEu13/101bE | CTGCTGAAACAGGGTTTTACCCCTTCCTTTCTTCAGGTTTCCTTCCTCGCGCCCGCAGGT  | 92  |
| PSTVdToNK12/868E  | CTGCTGAAACAGGGTTTTACCCCTTCCTTTCTTCAGGTTTCCTTCCTCGCGCCCGCAGGT  | 120 |
| PSTVdToNK13/567E  | CTGCTGAAACAGGGTTTTACCCCTTCCTTTCTTCAGGTTTCCTTCCTCGCGCCCGCAGGT  | 120 |
| PSTVdCaEu13/102E  | CTGCTGAAACAGGGTTTTACCCCTTCCTTTCTTCAGGTTTCCTTCCTCGCGCCCGCAGGT  | 120 |
| PSTVdToNK13/020E  | CTGCTGAAACAGGGTTTTACCCCTTCCTTTCTTCAGGTTTCCTTCCTCGCGCCCGCAGGT  | 120 |
|                   | *****                                                         |     |
| PSTVdToEu13/101bE | CCACCCCTCGCCCCCTTTGCGCTGTCGCTTCGGCTACTACCCGGTGGATACAACCTGAAGC | 152 |
| PSTVdToNK12/868E  | CCACCCCTCGCCCCCTTTGCGCTGTCGCTTCGGCTACT-----                   | 158 |
| PSTVdToNK13/567E  | CCACCCCTCGCCCCCTTTGCGCTGTCGCTTCGGCTACT-----                   | 158 |
| PSTVdCaEu13/102E  | CCACCCCTCGCCCCCTTTGCGCTGTCGCTTCGGCTACT-----                   | 158 |
| PSTVdToNK13/020E  | CCACCCCTCGCCCCCTTTGCGCTGTCGCTTCGGCTACT-----                   | 158 |
|                   | *****                                                         |     |
| PSTVdToEu13/101bE | T                                                             | 153 |
| PSTVdToNK12/868E  | -                                                             | 158 |
| PSTVdToNK13/567E  | -                                                             | 158 |
| PSTVdCaEu13/102E  | -                                                             | 158 |
| PSTVdToNK13/020E  | -                                                             | 158 |

**Figure S8.** Identical and nearly identical PSTVd sequences obtained from different seed lots. PSTVdToNK1713172C, PSTVdCaNA14/836E and PSTVdCaAf13/124E are identical and were found to have 100% nucleotide identity to the Chinese Potato spindle tuber viroid isolate ODN (KR611362.1) and others.

|                   |                                                                    |     |
|-------------------|--------------------------------------------------------------------|-----|
| PSTVdTo1713172C   | -----CTGGAGCGAACTGGCAATAAGGACGGTGGGGAGTGCCCAGCGGCCG                | 46  |
| PSTVdCaNA14/836E  | -----CTGGAGCGAACTGGCAATAAGGACGGTGGGGAGTGCCCAGCGGCCG                | 46  |
| PSTVdCaAf13/124E  | -----CTGGAGCGAACTGGCAATAAGGACGGTGGGGAGTGCCCAGCGGCCG                | 46  |
| PSTVdToME27642C   | -----CTGGAGCGAACTGGCAACAAGGACGGTGGGGAGTGCCCAGCGGCCG                | 46  |
| PSTVdCaSA1302191C | -----GGGGAAACCTGGAGCGAACTGGCAATAAG-GCGGTGGGGAGTGCCCAGCGGCCG        | 53  |
| PSTVdToEAs13/161E | ATCCCCGGGGAAACCTGGAGCGAACTGGCAATAAGGACGGTGGGGAGTGCCCAGCGGCCG       | 60  |
|                   | *****                                                              |     |
| PSTVdToNK1713172C | ACAGGAGTAATTCCCGCCGAAACAGGGTTTTACCCCTTCCTTTCTTCGGGTGTCCTTCCT       | 106 |
| PSTVdCaNA14/836E  | ACAGGAGTAATTCCCGCCGAAACAGGGTTTTACCCCTTCCTTTCTTCGGGTGTCCTTCCT       | 106 |
| PSTVdCaAf13/124E  | ACAGGAGTAATTCCCGCCGAAACAGGGTTTTACCCCTTCCTTTCTTCGGGTGTCCTTCCT       | 106 |
| PSTVdToME27642C   | ACAGGAGTAATTCCCGCCGAAACAGGGTTTTACCCCTTCCTTTCTTCGGGTGTCCTTCCT       | 106 |
| PSTVdCaSA1302191C | ACAGGAGTAATTCCCGCCGAAACAGGGTTTTACCCCTTCCTTTCTTCGGGTGTCCTTCCT       | 113 |
| PSTVdToEAs13/161E | ACAGGAGTAATTCCCGCCGAAACAGGGTTTTACCCCTTCCTTTCTTCGGGTGTCCTTCCT       | 120 |
|                   | *****                                                              |     |
| PSTVdToNK1713172C | CGCGCCCGCAGGACCACCCCTCGCCCCCTTTGCGCTGTCGCTTCGGCTACT-----           | 157 |
| PSTVdCaNA14/836E  | CGCGCCCGCAGGACCACCCCTCGCCCCCTTTGCGCTGTCGCTTCGGCTACT-----           | 157 |
| PSTVdCaAf13/124E  | CGCGCCCGCAGGACCACCCCTCGCCCCCTTTGCGCTGTCGCTTCGGCTACT-----           | 157 |
| PSTVdToME27642C   | CGCGCCCGCAGGACCACCCCTCGCCCCCTTTGCGCTGTCGCTTCGGTTACT-----           | 157 |
| PSTVdCaSA1302191C | CGCGCCCGCAGGACCACCCCTCGCCC-CTTTGCGCTGTCGCTTCGGCTACTACCCGGTGG       | 172 |
| PSTVdToEAs13/161E | CGCGCCCGCAGGACCACCCCTCGCCCCCTTTGCGCTGTCGCTTCGGCTACTACCCGGTGG       | 180 |
|                   | *****                                                              |     |
| PSTVdToNK1713172C | -----                                                              | 157 |
| PSTVdCaNA14/836E  | -----                                                              | 157 |
| PSTVdCaAf13/124E  | -----                                                              | 157 |
| PSTVdToME27642C   | -----                                                              | 157 |
| PSTVdCaSA1302191C | AAACAACCTGAAGCTCCCGAGAACCGCTTTTTCTCTATCTT-CCTTGCTTCGGGGCGAGGG      | 231 |
| PSTVdToEAs13/161E | AAACAACCTGAAGCTCCCGAGAACCGCTTTTTCTCTATCTTTCTTGCTTCGGGGCGAGGG       | 240 |
|                   |                                                                    |     |
| PSTVdToNK1713172C | -----                                                              | 157 |
| PSTVdCaNA14/836E  | -----                                                              | 157 |
| PSTVdCaAf13/124E  | -----                                                              | 157 |
| PSTVdToME27642C   | -----                                                              | 157 |
| PSTVdCaSA1302191C | TGTTTAGCCCTTGGAACCGCAGTTGGTTCCCT-----                              | 262 |
| PSTVdToEAs13/161E | TGTTTAGCCCTTGGAACCGCAGTTGGTTCCCTCGGAATAAAGGCGGCTCGGAGGAGCGCTTCAGGG | 300 |
|                   |                                                                    |     |
| PSTVdToNK1713172C | -----                                                              | 157 |
| PSTVdCaNA14/836E  | -----                                                              | 157 |
| PSTVdCaAf13/124E  | -----                                                              | 157 |
| PSTVdToME27642C   | -----                                                              | 157 |
| PSTVdCaSA1302191C | -----                                                              | 262 |
| PSTVdToEAs13/161E | ACACCTGACCTCCTGAGCAGAAAAGAAAAAGAGGCGGCTCGGAGGAGCGCTTCAGGG          | 359 |

**Figure S9.** Identical and nearly identical PSTVd isolates obtained from different seed lots. PSTVdToNK12/820E, PSTVdToNK13/1051E, PSTVdToAs13/1070E, PSTVdToNK13/1100E, PSTVdToNK13/1104E and PSTVdToNAm13/1206E are identical and were found to have 100% nucleotide identity to the Australian Potato spindle tuber viroid isolate CVNBC36 (KP454054) and others.

|                    |                                                              |     |
|--------------------|--------------------------------------------------------------|-----|
| PSTVdTOEu13/967E   | CTGGAGCGAACTGGCAAAAGGCGCGGTGGGGAGTGCCTCGCGGCCGACAGGAGTAATTCC | 60  |
| PSTVdToNK13/1046E  | CTGGAGCGAACTGGCAAAAGGCGCGGTGGGGAGTGCCTCGCGGCCGACAGGAGTAATTCC | 60  |
| PSTVdToEu27648C    | -----CAAAAGGCGCGGTGGGAAGTGCCTCGCGGCCGACAGGAGTAATTCC          | 46  |
| PSTVdToNK12/820E   | CTGGAGCGAACTGGCAAAAGGCGCGGTGGGGAGTGCCTCGCGGCCGACAGGAGTAATTCC | 60  |
| PSTVdToNK13/1051E  | CTGGAGCGAACTGGCAAAAGGCGCGGTGGGGAGTGCCTCGCGGCCGACAGGAGTAATTCC | 60  |
| PSTVdToAs13/1070E  | CTGGAGCGAACTGGCAAAAGGCGCGGTGGGGAGTGCCTCGCGGCCGACAGGAGTAATTCC | 60  |
| PSTVdToNK13/1100E  | CTGGAGCGAACTGGCAAAAGGCGCGGTGGGGAGTGCCTCGCGGCCGACAGGAGTAATTCC | 60  |
| PSTVdToNK13/1104E  | CTGGAGCGAACTGGCAAAAGGCGCGGTGGGGAGTGCCTCGCGGCCGACAGGAGTAATTCC | 60  |
| PSTVdToNAm13/1206E | CTGGAGCGAACTGGCAAAAGGCGCGGTGGGGAGTGCCTCGCGGCCGACAGGAGTAATTCC | 60  |
|                    | *****                                                        |     |
| PSTVdTOEu13/967E   | TGCCGAAACAGGGTTTTACCCCTTCCTTTCTTCAGGTTTCCTTCCTCGCGCCCGCAGGAT | 120 |
| PSTVdToNK13/1046E  | TGCCGAAACAGGGTTTTACCCCTTCCTTTCTTCAGGTTTCCTTCCTCGCGCCCGCAGGAT | 120 |
| PSTVdToEu27648C    | TGCCGAAACAGGGTTTTACCCCTTCCTTTCTTCAGGTTTCCTTCCTCGCGCCCGCAGGAT | 106 |
| PSTVdToNK12/820E   | TGCCGAAACAGGGTTTTACCCCTTCCTTTCTTCAGGTTTCCTTCCTCGCGCCCGCAGGAT | 120 |
| PSTVdToNK13/1051E  | TGCCGAAACAGGGTTTTACCCCTTCCTTTCTTCAGGTTTCCTTCCTCGCGCCCGCAGGAT | 120 |
| PSTVdToAs13/1070E  | TGCCGAAACAGGGTTTTACCCCTTCCTTTCTTCAGGTTTCCTTCCTCGCGCCCGCAGGAT | 120 |
| PSTVdToNK13/1100E  | TGCCGAAACAGGGTTTTACCCCTTCCTTTCTTCAGGTTTCCTTCCTCGCGCCCGCAGGAT | 120 |
| PSTVdToNK13/1104E  | TGCCGAAACAGGGTTTTACCCCTTCCTTTCTTCAGGTTTCCTTCCTCGCGCCCGCAGGAT | 120 |
| PSTVdToNAm13/1206E | TGCCGAAACAGGGTTTTACCCCTTCCTTTCTTCAGGTTTCCTTCCTCGCGCCCGCAGGAT | 120 |
|                    | *****                                                        |     |
| PSTVdTOEu13/967E   | CCACCCCTCGCCCCCTTGCCTGTGCTCGCTTTCGCTACT                      | 155 |
| PSTVdToNK13/1046E  | CACCCCTCGCCCCCTTGGACTGTGCTTTCGCTACT                          | 156 |
| PSTVdToEu27648C    | CACCCCTCGCCCCCTTGCCTGTGCTCGCTTTCGCTACT                       | 142 |
| PSTVdToNK12/820E   | CACCCCTCGCCCCCTTGCCTGTGCTCGCTTTCGCTACT                       | 156 |
| PSTVdToNK13/1051E  | CACCCCTCGCCCCCTTGCCTGTGCTCGCTTTCGCTACT                       | 156 |
| PSTVdToAs13/1070E  | CACCCCTCGCCCCCTTGCCTGTGCTCGCTTTCGCTACT                       | 156 |
| PSTVdToNK13/1100E  | CACCCCTCGCCCCCTTGCCTGTGCTCGCTTTCGCTACT                       | 156 |
| PSTVdToNK13/1104E  | CACCCCTCGCCCCCTTGCCTGTGCTCGCTTTCGCTACT                       | 156 |
| PSTVdToNAm13/1206E | CACCCCTCGCCCCCTTGCCTGTGCTCGCTTTCGCTACT                       | 156 |
|                    | *****                                                        |     |

**Figure S10.** Identical TCDVd sequences from different seed lots. TCDVdToAf130227C and TCDVdToMEMC27642C are identical and were found to have 100% nucleotide identity with UK isolate Tomato chlorotic dwarf viroid (EF582393).

|                   |                                                               |     |
|-------------------|---------------------------------------------------------------|-----|
| TCDVdToAf         | -----GGGGAAACCTGGAGCGAACTGGCAAAAGGCGGCAGGGAGCTTGTGGAAGGCGAA   | 54  |
| TCDVdToMEMC27642C | ATCCCCGGGGAAACCTGGAGCGAACTGGCAAAAGGCGGCAGGGAGCTTGTGGAAGGCGAA  | 60  |
|                   | *****                                                         |     |
| TCDVdToAf         | ACAGGAGTAATCCCAGAGAGAAACAGGGTTTTACCCCTTCCTTTCTGATTCGGTTTCCTTC | 114 |
| TCDVdToMEMC27642C | ACAGGAGTAATCCCAGAGAGAAACAGGGTTTTACCCCTTCCTTTCTGATTCGGTTTCCTTC | 120 |
|                   | *****                                                         |     |
| TCDVdToAf         | CTTTGCGCGCCACTCGACCCCTCGCCCCCTTGCCTGTGCTTCGGCAACTACCCGGTGG    | 174 |
| TCDVdToMEMC27642C | CTTTGCGCGCCACTCGACCCCTCGCCCCCTTGCCTGTGCTTCGGCAACTACCCGGTGG    | 180 |
|                   | *****                                                         |     |
| TCDVdToAf         | AAACAACCTGAAGCTCCCGAGAACCGCTTTTTCTCTATCTTGCTGCTACCGGGGCGAGGGT | 234 |
| TCDVdToMEMC27642C | AAACAACCTGAAGCTCCCGAGAACCGCTTTTTCTCTATCTTGCTGCTACCGGGGCGAGGGT | 240 |
|                   | *****                                                         |     |
| TCDVdToAf         | GTTTAGCCCTTGGAACCGCAGTTGGTTCCTCGGAACCTAACTCGTGGTTCCTGTGGTTCA  | 294 |
| TCDVdToMEMC27642C | GTTTAGCCCTTGGAACCGCAGTTGGTTCCTCGGAACCTAACTCGTGGTTCCTGTGGTTCA  | 300 |
|                   | *****                                                         |     |
| TCDVdToAf         | CACCTGACCTCCTGTGCAGAAAAGAAAAAGATAGGCGGCTCGGAGGAGCGCTTCAGGAT   | 354 |
| TCDVdToMEMC27642C | CACCTGACCTCCTGTGCAGAAAAGAAAAAGATAGGCGGCTCGGAGGAGCGCTTCAGGAT   | 358 |
|                   | *****                                                         |     |
| TCDVdToAf         | AGGCCATGT                                                     | 363 |
| TCDVdToMEMC27642C | -----                                                         | 358 |

**Figure S11.** Distinct CLVd sequences obtained from different seed lots. No CLVd seed isolates were identical. CLVdCaEu16169C and CLVdCaEA1302154C had one nucleotide difference between the overlapping sequences. CLVdCaEu16169C had 98% nucleotide identity to Thailand isolate Columnnea latent viroid clone Prayong-16 (KC143294). CLVdCaEA1302154C had 99% nucleotide identity to Thailand isolate Columnnea latent viroid clone Prayong-16 (KC143294) and others.

|                  |                                                                        |     |
|------------------|------------------------------------------------------------------------|-----|
| CLVdCaEu16169C   | -----                                                                  | 0   |
| CLVdCaEA1302154C | CGGAAC TAAACTCGTGGTTCCTGTGGTTCACACCTGACCCCTGCAGCCATGCAAAGAAAAA         | 60  |
| CLVdCaEu16169C   | -----                                                                  | 0   |
| CLVdCaEA1302154C | AAGAACGGGAGGAAGAGCGCAAGAGCGGTCTCAGGAGCCCCTGGGGCAACTCAGACCGAG           | 120 |
| CLVdCaEu16169C   | -----TTCAGACAGGAGTAATACCAGCTGAAACAGG                                   | 31  |
| CLVdCaEA1302154C | CGGGGTCTTGACCAGTGGCGAGCGCCCTGTTTCAGACAGGAGTAATCCCAGCTGAAACAGG<br>***** | 180 |
| CLVdCaEu16169C   | GTTTTCACCCCTTCCTTTCTTCTGGTTCCTTCCTCTGCTTCAGCGGCCTCGCCCGGAGTC           | 91  |
| CLVdCaEA1302154C | GTTTTCACCCCTTCCTTTCTTCTGGTTCCTTCCTCTGCTTCAGCGGCCTCGCCCGGAGTC<br>*****  | 240 |
| CLVdCaEu16169C   | TTGACCAGCGCAGGTTCTGACGCGACCGGTGGCATCACCGAGTTCGCTCAAGCCTCAACC           | 151 |
| CLVdCaEA1302154C | TTGACCAGCGCAGGTTCTGACGCGACCGGTGGCATCACCGAGTTCGCTCAAGCCTCAACC<br>*****  | 300 |
| CLVdCaEu16169C   | TCCTTTTCTTCTATTCTAGCTTGGTCTCCGGGCGAGGGTGTTTAGCCCTTGGAACCGCAG           | 211 |
| CLVdCaEA1302154C | TCCTTTTCTTCTATTCTAGCTTGGTCTCCGGGCGAGGGTGTTTAGCCCTTGGAACCGCAG<br>*****  | 360 |
| CLVdCaEu16169C   | TTGGTTCCTCGGAAC TAAACTCGTGGTTCCTGTGGTTCACACCTGACCCCTGCAGCCATGC         | 271 |
| CLVdCaEA1302154C | TTGGTTCCT-----<br>*****                                                | 369 |
| CLVdCaEu16169C   | AAAGAAAAAAGAACGGGAGGAAGAGCGCAAGAGCGGTCTCAGGAGCCCC                      | 322 |
| CLVdCaEA1302154C | -----                                                                  | 3   |

**Figure S12.** Distinct CLVd sequences. CLVdToAs13/1073E and CLVdToAs13/1076E were most closely related and had four nucleotide differences between the overlapping sequences. CLVdToAs13/1073E had 99% nucleotide identity to Thailand isolate CLVd isolate CM10-6c1 (JF446929). CLVdToAs13/1076E had 98% nucleotide identity to Thailand isolate CLVd isolate CM10-6c1 (JF446929).

|                  |                                                                         |     |
|------------------|-------------------------------------------------------------------------|-----|
| CLVdToAs13/1073E | CGGAAC TAAACTCGTGGTTCCTGTGGTTCACACCTGACCCCTGCAGCCATGCAAAGAAAAA          | 60  |
| CLVdToAs13/1076E | CGGAAC TAAACTCGTGGTTCCTGTGGTTCACACCTGACCCCTGCAGCCATGCAAAGAAAAA<br>***** | 60  |
| CLVdToAs13/1073E | AAGAACGGGAGGAAGAGCGCAAGAGCGGTCTCAGGAGCCCCGGGGCAACTCAGACCGAGC            | 120 |
| CLVdToAs13/1076E | AAGATTGGGAGGAGAGCGCAAGAGCGGTCTCAGGAGCCCCGGGGCAACTCAGACCGAGC<br>****     | 120 |
| CLVdToAs13/1073E | GGGGATCGCGACCGAGGGCGGAAGCCTGCTTCAGACAGGAGTAATCCCCGCTGAAACAG             | 180 |
| CLVdToAs13/1076E | GGGGATCGCGACCGAGGGCGGAAGCCTGCTTCAGACAGGAGTANNNNNNNNNNNNNNN<br>*****     | 180 |
| CLVdToAs13/1073E | GGTTTTACCCCTTCCTTTCTTCGGGTTTCCTTCCTCTGCTTGCGGCCTCGCCCGGAGTCT            | 240 |
| CLVdToAs13/1076E | NNNNNN--NNNNNNNNNNNNNNNNNNNNNTTCCTCTGCTTGCGGCCTCGCCCGGAGTCT<br>*****    | 238 |
| CLVdToAs13/1073E | TCGAATCCAGCGCAGGTTCTGACGCGACCGGTGGCATCACCGAGTTGCTCAAGCCTCAAC            | 300 |
| CLVdToAs13/1076E | TCGAATCCAGCGCAGGTTCTGACGCGACCGGTGGCATCACCGAGTTGCTCAAGCCTCAAC<br>*****   | 298 |
| CLVdToAs13/1073E | CTCCTTTTCTCTATTCTACGCTTGGTCTCCGGGCGAGGGTGTTTAGCCCTTGGAACCGC             | 360 |
| CLVdToAs13/1076E | CTCCTTTTCTCTATTCTACGCTTGGTCTCCGGGCGAGGGTGTTTAGCCCTTGGAACCGC<br>*****    | 358 |
| CLVdToAs13/1073E | AGTTGGTTCCT                                                             | 371 |
| CLVdToAs13/1076E | AGTTGGTTCCT<br>*****                                                    | 369 |

**Figure S13.** Distinct CLVd sequences. CLVdToAs13/1075E and CLVdToAs13/1074E were most closely related and had two nucleotide differences between the overlapping sequences. CLVdToAs13/1074E 98% nucleotide identity to Thailand isolate CLVd isolate CM10-6c1 (JF446929). CLVdToAs13/1075E had 99% nucleotide identity to Thailand isolate CLVd isolate CM10-6c1 (JF446929.1).

|                  |                                                                |     |
|------------------|----------------------------------------------------------------|-----|
| CLVdToAs13/1074E | CGGAACATAAACTCGTGGTTCCTGTGGTTCACACCTGACCCCTGCAGCCATGCAAAGAAAAA | 60  |
| CLVdToAs13/1075E | CGGAACATAAACTCGTGGTTCCTGTGGTTCACACCTGACCCCTGCAGCCATGCAAAGAAAAA | 59  |
| *****            |                                                                |     |
| CLVdToAs13/1074E | AAGATTGGGAGGAAGAGCGCAAGAGCGGTCTCAGGAGCCCCGGGGCAACTCAGACCGAGC   | 120 |
| CLVdToAs13/1075E | AAGAACGGGAGGAAGAGCGCAAGAGCGGTCTCAGGAGCCCCGGGGCAACTCAGACCGAGC   | 119 |
| **** *           |                                                                |     |
| CLVdToAs13/1074E | GGGGATCGCGGACCGAGGGCGGAAGCCTGCTTCAGACAGGAGTAATCCCCGCTGAAACAG   | 180 |
| CLVdToAs13/1075E | GGGGATCGCGGACCGAGGGCGGAAGCCTGCTTCAGACAGGAGTAATCCCCGCTGAAACAG   | 179 |
| *****            |                                                                |     |
| CLVdToAs13/1074E | GGTTTTACCCCTTCCTTTCTTCGGGTTTCCTTCCTCTGCTTGCGGCCTCGCCCGGAGTCT   | 240 |
| CLVdToAs13/1075E | GGTTTTACCCCTTCCTTTCTTCGGGTTTCCTTCCTCTGCTTGCGGCCTCGCCCGGAGTCT   | 239 |
| *****            |                                                                |     |
| CLVdToAs13/1074E | TCGAATCCAGCGCAGGTTCAGCGGACCGGTGGCATCACCGAGTTGCTCAAGCCTCATC     | 300 |
| CLVdToAs13/1075E | TCGAATCCAGCGCAGGTTCAGCGGACCGGTGGCATCACCGAGTTGCTCAAGCCTCATC     | 299 |
| *****            |                                                                |     |
| CLVdToAs13/1074E | CTCCTTTTCTCTATTCTACGCTTGGTCTCCGGGCGAGGGTGTTAGCCCTTGGAAACCGC    | 360 |
| CLVdToAs13/1075E | CTCCTTTTCTCTATTCTACGCTTGGTCTCCGGGCGAGGGTGTTAGCCCTTGGAAACCGC    | 359 |
| *****            |                                                                |     |
| CLVdToAs13/1074E | AGTTGGTTCCT                                                    | 371 |
| CLVdToAs13/1075E | AGTTGGTTCCT                                                    | 370 |
| *****            |                                                                |     |

**Figure S14.** Identical PCFVd sequences obtained from different seed lots. The listed PCFVd seed isolates are identical to KC762952 across the available sequence. KC762952 differed from KC762953 (another isolate from the seed detections) by two nucleotides. PCFVdCaME15/707E, PCFVdToME14/0008E and PCFVdToAf14/1068E isolates are identical and have 99% nucleotide identity with isolates KC762952.1 and KC762953.1 previously found in seed tested by Australia.

|                    |                                                              |     |
|--------------------|--------------------------------------------------------------|-----|
| PCFVdCaNK13/1127E  | CCGGATTCTTCTAAGGGTGCCTGTGGTGCCTCCCCGAAGCCCGCTTAGGGAAAAAGAAA  | 60  |
| PCFVdToNAm13/968E  | CCGGATTCTTCTAAGGGTGCCTGTGGTGCCTCCCCGAAGCCCGCTTAGGGAAAAAGAAA  | 60  |
| PCFVdCaNK13/1192E  | CCGGATTCTTCTAAGGGTGCCTGTGGTGCCTCCCCGAAGCCCGCTTAGGGAAAAAGAAA  | 60  |
| KC762952.1         | CCGGATTCTTCTAAGGGTGCCTGTGGTGCCTCCCCGAAGCCCGCTTAGGGAAAAAGAAA  | 60  |
| KC762953.1         | CCGGATTCTTCTAAGGGTGCCTGTGGTGCCTCCCCGAAGCCCGCTTAGGGAAAAAGAAA  | 60  |
| PCFVdToAf14/1068E  | -----                                                        | 0   |
| PCFVdToME14/0008E  | -----                                                        | 0   |
| PCFVdCaME15/707E   | -----                                                        | 0   |
| PCFVdToNK13/1170E  | -----                                                        | 0   |
| PCFVdToEu13/1252E  | -----                                                        | 0   |
| PCFVdCaNAm14/628E  | -----                                                        | 0   |
| PCFVdToNAm14/675E  | -----                                                        | 0   |
| PCFVdCaEAs14/847E  | -----                                                        | 0   |
| PCFVdCaEAs14/981E  | -----                                                        | 0   |
| PCFVdCaAs14/1107E  | -----                                                        | 0   |
| PCFVdCaEAs14/1154E | -----                                                        | 0   |
|                    |                                                              |     |
| PCFVdCaNK13/1127E  | GGGGAAGCAAGCATCTCCTGTTCAGGGATCCCCGGGGAAACCTGGACAGACCGGGCGGAG | 120 |
| PCFVdToNAm13/968E  | GGGGAAGCAAGCATCTCCTGTTCAGGGATCCCCGGGGAAACCTGGACAGACCGGGCGGAG | 120 |
| PCFVdCaNK13/1192E  | GGGGAAGCAAGCATCTCCTGTTCAGGGATCCCCGGGGAAACCTGGACAGACCGGGCGGAG | 120 |
| KC762952.1         | GGGGAAGCAAGCATCTCCTGTTCAGGGATCCCCGGGGAAACCTGGACAGACCGGGCGGAG | 120 |
| KC762953.1         | GGGGAAGCAAGCATCTCCTGTTCAGGGATCCCCGGGGAAACCTGGACAGACCGGGCGGAG | 120 |
| PCFVdToAf14/1068E  | -----CTGGACAGACCGGGCGGAG                                     | 19  |
| PCFVdToME14/0008E  | -----CTGGACAGACCGGGCGGAG                                     | 19  |
| PCFVdCaME15/707E   | -----CTGGACAGACCGGGCGGAG                                     | 19  |
| PCFVdToNK13/1170E  | -----CTGGACAGACCGGGCGGAG                                     | 19  |
| PCFVdToEu13/1252E  | -----CTGGACAGACCGGGCGGAG                                     | 19  |
| PCFVdCaNAm14/628E  | -----CTGGACAGACCGGGCGGAG                                     | 19  |

|                    |                          |    |
|--------------------|--------------------------|----|
| PCFVdToNA14/675E   | -----CTGGACAGACCGGGCGGAG | 19 |
| PCFVdCaEAs14/847E  | -----CTGGACAGACCGGGCGGAG | 19 |
| PCFVdCaEAs14/981E  | -----CTGGACAGACCGGGCGGAG | 19 |
| PCFVdCaAs14/1107E  | -----CTGGACAGACCGGGCGGAG | 19 |
| PCFVdCaEAs14/1154E | -----CTGGACAGACCGGGCGGAG | 19 |
|                    | *****                    |    |

|                    |                                                             |     |
|--------------------|-------------------------------------------------------------|-----|
| PCFVdCaNK13/1127E  | AAGCGCACGAGCGGGACCGTCTTCTGACAGGAGTAATCCCCGCTGAAACAGGGATTTTC | 180 |
| PCFVdToNA13/968E   | AAGCGCACGAGCGGGACCGTCTTCTGACAGGAGTAATCCCCGCTGAAACAGGGATTTTC | 180 |
| PCFVdCaNK13/1192E  | AAGCGCACGAGCGGGACCGTCTTCTGACAGGAGTAATCCCCGCTGAAACAGGGATTTTC | 180 |
| KC762952.1         | AAGCGCACGAGCGGGACCGTCTTCTGACAGGAGTAATCCCCGCTGAAACAGGGATTTTC | 180 |
| KC762953.1         | AAGCGCACGAGCGGGACCGTCTTCTGACAGGAGTAATCCCCGCTGAAACAGGGATTTTC | 180 |
| PCFVdToAf14/1068E  | AAGCGCACGAGCGGGACCGTCTTCTGACAGGAGTAATCCCCGCTGAAACAGGGATTTTC | 79  |
| PCFVdToME14/0008E  | AAGCGCACGAGCGGGACCGTCTTCTGACAGGAGTAATCCCCGCTGAAACAGGGATTTTC | 79  |
| PCFVdCaME15/707E   | AAGCGCACGAGCGGGACCGTCTTCTGACAGGAGTAATCCCCGCTGAAACAGGGATTTTC | 79  |
| PCFVdToNK13/1170E  | AAGCGCACGAGCGGGACCGTCTTCTGACAGGAGTAATCCCCGCTGAAACAGGGATTTTC | 79  |
| PCFVdToEu13/1252E  | AAGCGCACGAGCGGGACCGTCTTCTGACAGGAGTAATCCCCGCTGAAACAGGGATTTTC | 79  |
| PCFVdCaNA14/628E   | AAGCGCACGAGCGGGACCGTCTTCTGACAGGAGTAATCCCCGCTGAAACAGGGATTTTC | 79  |
| PCFVdToNA14/675E   | AAGCGCACGAGCGGGACCGTCTTCTGACAGGAGTAATCCCCGCTGAAACAGGGATTTTC | 79  |
| PCFVdCaEAs14/847E  | AAGCGCACGAGCGGGACCGTCTTCTGACAGGAGTAATCCCCGCTGAAACAGGGATTTTC | 79  |
| PCFVdCaEAs14/981E  | AAGCGCACGAGCGGGACCGTCTTCTGACAGGAGTAATCCCCGCTGAAACAGGGATTTTC | 79  |
| PCFVdCaAs14/1107E  | AAGCGCACGAGCGGGACCGTCTTCTGACAGGAGTAATCCCCGCTGAAACAGGGATTTTC | 79  |
| PCFVdCaEAs14/1154E | AAGCGCACGAGCGGGACCGTCTTCTGACAGGAGTAATCCCCGCTGAAACAGGGATTTTC | 79  |
|                    | *****:*** :                                                 |     |

|                    |                                                              |     |
|--------------------|--------------------------------------------------------------|-----|
| PCFVdCaNK13/1127E  | CCTTCCTTTCTTCGGGTTTCCTTCCTCAGTCGACCGGTCCGCGTCGGCCTTCTCGCGCAC | 240 |
| PCFVdToNA13/968E   | CCTTCCTTTCTTCGGGTTTCCTTCCTCAGTCGACCGGTCCGCGTCGGCCTTCTCGCGCAC | 240 |
| PCFVdCaNK13/1192E  | CCTTCCTTTCTTCGGGTTTCCTTCCTCAGTCGACCGGTCCGCGTCGGCCTTCTCGCGCAC | 240 |
| KC762952.1         | CCTTCCTTTCTTCGGGTTTCCTTCCTCAGTCGACCGGTCCGCGTCGGCCTTCTCGCGCAC | 240 |
| KC762953.1         | CCTTCCTTTCTTCGGGTTTCCTTCCTCAGTCGACCGGTCCGCGTCGGCCTTCTCGCGCAC | 240 |
| PCFVdToAf14/1068E  | CCTTCCTTTCTTCGGGTTTCCTTCCTCAGTCGACCGGTCCGCGTCGGCCTTCTCGCGCAC | 139 |
| PCFVdToME14/0008E  | CCTTCCTTTCTTCGGGTTTCCTTCCTCAGTCGACCGGTCCGCGTCGGCCTTCTCGCGCAC | 139 |
| PCFVdCaME15/707E   | CCTTCCTTTCTTCGGGTTTCCTTCCTCAGTCGACCGGTCCGCGTCGGCCTTCTCGCGCAC | 139 |
| PCFVdToNK13/1170E  | CCTTCCTTTCTTCGGGTTTCCTTCCTCAGTCGACCGGTCCGCGTCGGCCTTCTCGCGCAC | 139 |
| PCFVdToEu13/1252E  | CCTTCCTTTCTTCGGGTTTCCTTCCTCAGTCGACCGGTCCGCGTCGGCCTTCTCGCGCAC | 139 |
| PCFVdCaNA14/628E   | CCTTCCTTTCTTCGGGTTTCCTTCCTCAGTCGACCGGTCCGCGTCGGCCTTCTCGCGCAC | 139 |
| PCFVdToNA14/675E   | CCTTCCTTTCTTCGGGTTTCCTTCCTCAGTCGACCGGTCCGCGTCGGCCTTCTCGCGCAC | 139 |
| PCFVdCaEAs14/847E  | CCTTCCTTTCTTCGGGTTTCCTTCCTCAGTCGACCGGTCCGCGTCGGCCTTCTCGCGCAC | 139 |
| PCFVdCaEAs14/981E  | CCTTCCTTTCTTCGGGTTTCCTTCCTCAGTCGACCGGTCCGCGTCGGCCTTCTCGCGCAC | 139 |
| PCFVdCaAs14/1107E  | CCTTCCTTTCTTCGGGTTTCCTTCCTCAGTCGACCGGTCCGCGTCGGCCTTCTCGCGCAC | 139 |
| PCFVdCaEAs14/1154E | CCTTCCTTTCTTCGGGTTTCCTTCCTCAGTCGACCGGTCCGCGTCGGCCTTCTCGCGCAC | 139 |
|                    | *****                                                        |     |

|                    |                                                           |     |
|--------------------|-----------------------------------------------------------|-----|
| PCFVdCaNK13/1127E  | TGCTGTCCGGCTACTACCCGGTGGATACAACAGAGAGGTGCTTTTCTTCCACCCGAC | 300 |
| PCFVdToNA13/968E   | TGCTGTCCGGCTACTACCCGGTGGATACAACAGAGAGGTGCTTTTCTTCCACCCAAC | 300 |
| PCFVdCaNK13/1192E  | TGCTGTCCGGCTACTACCCGGTGGATACAACAGAGAGGTGCTTTTCTTCCACCCGAC | 300 |
| KC762952.1         | TGCTGTCCGGCTACTACCCGGTGGATACAACAGAGAGGTGCTTTTCTTCCACCCAAC | 300 |
| KC762953.1         | TGCTGTCCGGCTACTACCCGGTGGATACAACAGAGAGGTGCTTTTCTTCCACCCGAC | 300 |
| PCFVdToAf14/1068E  | TGCTGTCCGGCTACT-----                                      | 154 |
| PCFVdToME14/0008E  | TGCTGTCCGGCTACT-----                                      | 154 |
| PCFVdCaME15/707E   | TGCTGTCCGGCTACT-----                                      | 154 |
| PCFVdToNK13/1170E  | TGCTGTCCGGCTACT-----                                      | 154 |
| PCFVdToEu13/1252E  | TGCTGTCCGGCTACT-----                                      | 154 |
| PCFVdCaNA14/628E   | TGCTGTCCGGCTACT-----                                      | 154 |
| PCFVdToNA14/675E   | TGCTGTCCGGCTACT-----                                      | 154 |
| PCFVdCaEAs14/847E  | TGCTGTCCGGCTACT-----                                      | 154 |
| PCFVdCaEAs14/981E  | TGCTGTCCGGCTACT-----                                      | 154 |
| PCFVdCaAs14/1107E  | TGCTGTCCGGCTACT-----                                      | 154 |
| PCFVdCaEAs14/1154E | TGCTGTCCGGCTACT-----                                      | 154 |
|                    | *****                                                     |     |

|                    |                                                   |     |
|--------------------|---------------------------------------------------|-----|
| PCFVdCaNK13/1127E  | TTCTACCGACGCGGCCGGGAGTGAAGCTACCCGGGACCCGAGAGGATCT | 349 |
| PCFVdToNA13/968E   | TTCTACCGACGCGGCCGGGAGTGAAGCTACCCGGGACCCGAGAGGATCT | 349 |
| PCFVdCaNK13/1192E  | TTCTACCGACGCGGCCGGGAGTGAAGCTACCCGGGACCCGAGAGGATCT | 349 |
| KC762952.1         | TTCTACCGACGCGGCCGGGAGTGAAGCTACCCGGGACCCGAGAGGATCT | 349 |
| KC762953.1         | TTCTACCGACGCGGCCGGGAGTGAAGCTACCCGGGACCCGAGAGGATCT | 349 |
| PCFVdToAf14/1068E  | -----                                             | 154 |
| PCFVdToME14/0008E  | -----                                             | 154 |
| PCFVdCaME15/707E   | -----                                             | 154 |
| PCFVdToNK13/1170E  | -----                                             | 154 |
| PCFVdToEu13/1252E  | -----                                             | 154 |
| PCFVdCaNA14/628E   | -----                                             | 154 |
| PCFVdToNA14/675E   | -----                                             | 154 |
| PCFVdCaEAs14/847E  | -----                                             | 154 |
| PCFVdCaEAs14/981E  | -----                                             | 154 |
| PCFVdCaAs14/1107E  | -----                                             | 154 |
| PCFVdCaEAs14/1154E | -----                                             | 154 |

**Figure S15.** Identical CEVd sequences obtained from different seed lots. CEVdToNK13/042E and CEVdToEu27649 are identical and each has 100% nucleotide identity with Canadian isolate CEVd isolate imp2, (EU877743.1). CEVdToEu13/009E, CEVdToNK13/020E, CEVdToSAm13/008E, CEVdToNK13/45E, CEVdToNK13/019E, CEVdToEu13/046E and CEVdCaEA13/126E are identical and have 99% nucleotide identity with Belgian CEVd isolate GBVdC\_CEVd02 (KX084708.1) and Canadian isolate CEVd isolate imp2 (EU877743.1). CEVdToEu13/046E and CEVdCaEA13/126E are identical and have 98% nucleotide identity with Belgian CEVd isolate GBVdC\_CEVd02 (KX084708.1).

|                  |                                                               |     |
|------------------|---------------------------------------------------------------|-----|
| CEVdToEu27649    | -----GCTGCTTCGGTCGCCGCGGATCACTGGCGTC                          | 31  |
| CEVdToEu13/046E  | CTGGAGGAAGTCGAGGTCGGGGGGGAACAGCTGCTTCGGTCGCCGCGGATCCCTGGCGTC  | 60  |
| CEVdCaEA13/126E  | CTGGAGGAAGTCGAGGTCGGGGGGGAACAGCTGCTTCGGTCGCCGCGGATCCCTGGCGTC  | 60  |
| CEVdToNK13/020E  | CTGGAGGAAGTCGAGGTCGGGGGGGAACAGCTGCTTCGGTCGCCGCGGATCCCTGGCGTC  | 60  |
| CEVdToEu13/009E  | CTGGAGGAAGTCGAGGTCGGGGGGGAACAGCTGCTTCGGTCGCCGCGGATCCCTGGCGTC  | 60  |
| CEVdToSAm13/008E | CTGGAGGAAGTCGAGGTCGGGGGGGAACAGCTGCTTCGGTCGCCGCGGATCCCTGGCGTC  | 60  |
| CEVdToNK13/45E   | CTGGAGGAAGTCGAGGTCGGGGGGGAACAGCTGCTTCGGTCGCCGCGGATCCCTGGCGTC  | 60  |
| CEVdToNK13/019E  | CTGGAGGAAGTCGAGGTCGGGGGGGAACAGCTGCTTCGGTCGCCGCGGATCCCTGGCGTC  | 60  |
| CEVdToNK13/042E  | CTGGAGGAAGTCGAGGTCGGGGGGGAACAGCTGCTTCGGTCGCCGCGGATCACTGGCGTC  | 60  |
|                  | *****                                                         |     |
| CEVdToEu27649    | CAGCGGAGAAACAGGAGCTCGTCTCCTTCCTTTTCGCTGCTGGCTCCACATCCGATCGTCG | 91  |
| CEVdToEu13/046E  | CAGCGGAGAAACAGGAGCTCGTCTCCTTCCTTTTCGCTGCTGGCTCCACATCCGATCGTCG | 120 |
| CEVdCaEA13/126E  | CAGCGGAGAAACAGGAGCTCGTCTCCTTCCTTTTCGCTGCTGGCTCCACATCCGATCGTCG | 120 |
| CEVdToNK13/020E  | CAGCGGAGAAACAGGAGCTCGTCTCCTTCCTTTTCGCTGCTGGCTCCACATCCGATCGTCG | 120 |
| CEVdToEu13/009E  | CAGCGGAGAAACAGGAGCTCGTCTCCTTCCTTTTCGCTGCTGGCTCCACATCCGATCGTCG | 120 |
| CEVdToSAm13/008E | CAGCGGAGAAACAGGAGCTCGTCTCCTTCCTTTTCGCTGCTGGCTCCACATCCGATCGTCG | 120 |
| CEVdToNK13/45E   | CAGCGGAGAAACAGGAGCTCGTCTCCTTCCTTTTCGCTGCTGGCTCCACATCCGATCGTCG | 120 |
| CEVdToNK13/019E  | CAGCGGAGAAACAGGAGCTCGTCTCCTTCCTTTTCGCTGCTGGCTCCACATCCGATCGTCG | 120 |
| CEVdToNK13/042E  | CAGCGGAGAAACAGGAGCTCGTCTCCTTCCTTTTCGCTGCTGGCTCCACATCCGATCGTCG | 120 |
|                  | *****                                                         |     |
| CEVdToEu27649    | CTGAAGCGCCACGCCCCCTCGCCCGGAGCTTCTCTCTGGAGACTACCCGGTGGAACAAC   | 151 |
| CEVdToEu13/046E  | CTGAAGCGCCACTCCCCCTCGCCCGGAGCTTCTCTCTGGAGACT-----             | 164 |
| CEVdCaEA13/126E  | CTGAAGCGCCACTCCCCCTCGCCCGGAGCTTCTCTCTGGAGACT-----             | 164 |
| CEVdToNK13/020E  | CTGAAGCGCCACGCCCCCTCGCCCGGAGCTTCTCTCTGGAGACT-----             | 164 |
| CEVdToEu13/009E  | CTGAAGCGCCACGCCCCCTCGCCCGGAGCTTCTCTCTGGAGACT-----             | 164 |
| CEVdToSAm13/008E | CTGAAGCGCCACGCCCCCTCGCCCGGAGCTTCTCTCTGGAGACT-----             | 164 |
| CEVdToNK13/45E   | CTGAAGCGCCACGCCCCCTCGCCCGGAGCTTCTCTCTGGAGACT-----             | 164 |
| CEVdToNK13/019E  | CTGAAGCGCCACGCCCCCTCGCCCGGAGCTTCTCTCTGGAGACT-----             | 164 |
| CEVdToNK13/042E  | CTGAAGCGCCACGCCCCCTCGCCCGGAGCTTCTCTCTGGAGACT-----             | 164 |
|                  | *****                                                         |     |
| CEVdToEu27649    | TGAAGCTTCTCTCTGGAGACTACCCGGTGGAACAAC                          | 194 |
| CEVdToEu13/046E  | -----                                                         | 164 |
| CEVdCaEA13/126E  | -----                                                         | 164 |
| CEVdToNK13/020E  | -----                                                         | 164 |
| CEVdToEu13/009E  | -----                                                         | 164 |
| CEVdToSAm13/008E | -----                                                         | 164 |
| CEVdToNK13/45E   | -----                                                         | 164 |
| CEVdToNK13/019E  | -----                                                         | 164 |
| CEVdToNK13/042E  | -----                                                         | 164 |
