# Supplementary material for: Viroid-infected Tomato and Capsicum Seed Shipments to Australia
Source: MDPI journal article supplement (doi:10.3390/v11020098), 2019-01-24
Supplement: s1 [file s1]

### Supplementary file 1. Matches to sequences in the Genbank database.

This supplementary file provides a number of the sequences obtained from seed lots and an analysis of likely associations of the isolates. Generally the longest available sequences were selected for this file and analysis.

### Methods

The GenBank non-redundant nucleotide sequence database was searched for matches to the sequences by using the BLASTN (BLAST nucleotide) program. Dendrograms generated by the minimum evolution method, as implemented in BLASTN suite of programs, were used along with the BLASTN search results to find the closest matching sequences in the database and to identify clusters of isolates to which the seed isolates were likely to belong. Alignments were made using the MAFFT programs and the FFT-NS-i method, with a gap opening parameter of 1.

Isolates from seed lots were named using the following convention: viroid species, host, location, submission reference number and first initial of testing laboratory.

Host: Ca= Capsicum; To = Tomato,

Region: Eu = Europe; EA – east Asia; NK = region not known; ME = middle east; As = Asia; SAm = South America; SAs – South Asia

Lab: C=CHS; E = EAMI

### References to methods

- Altschul, G.F.; Gish, W.; Miller, W.; Myers, E.W.; Lipman, D.J. Basic local alignment search tool. *J. Mol. Biol.* **1990**, *215*, 403–410.
- blastn suite. National Center for Biotechnology Information. Available online: <https://blast.ncbi.nlm.nih.gov/Blast.cgi> (accessed on 30 November 2018).
- Katoh, K.; Standley, D.M. MAFFT Multiple Sequence Alignment Software Version 7: Improvements in Performance and Usability. *Mol. Biol. Evol.* **2013**, *30*, 772–80.
- MAFFT alignment implementation: <https://mafft.cbrc.jp/alignment/server/>

**Table S1.** Matches to sequences in the Genbank non-redundant database.

|                                                                                                                                                                                                                                                                                                                                                                                                                                                                                                                                                                                                                                                                                                                                                                                                                                                                                                                                                                                                                                                                                                         |
|---------------------------------------------------------------------------------------------------------------------------------------------------------------------------------------------------------------------------------------------------------------------------------------------------------------------------------------------------------------------------------------------------------------------------------------------------------------------------------------------------------------------------------------------------------------------------------------------------------------------------------------------------------------------------------------------------------------------------------------------------------------------------------------------------------------------------------------------------------------------------------------------------------------------------------------------------------------------------------------------------------------------------------------------------------------------------------------------------------|
| CLVd                                                                                                                                                                                                                                                                                                                                                                                                                                                                                                                                                                                                                                                                                                                                                                                                                                                                                                                                                                                                                                                                                                    |
| CLVdCaEA1302154C, CLVdToME1155E, CLVdToME1273E are closest to the sequences of a cluster of isolates that includes Rutgers 3 (JF742635.1), Prayong-16 (KC143294.1) and Chaipayong-16 (KM214217.1); BLAST searches indicated 98-99% identity and 100% coverage. CLVdToAs1385E is closest to the sequences of a cluster of isolates that includes CM10-6c1 (JF446929.1) and NC17 (AM698094.1); BLAST searches indicated 98-99% identity and 100% coverage. CLVdToNK1285E is closest to sequences of a cluster that includes PQ-49 (DQ923058) and MC-M-11 (AM698095) with 99% identity and 100% coverage.                                                                                                                                                                                                                                                                                                                                                                                                                                                                                                  |
| PSTVd                                                                                                                                                                                                                                                                                                                                                                                                                                                                                                                                                                                                                                                                                                                                                                                                                                                                                                                                                                                                                                                                                                   |
| PSTVdCaSAm1302191C is closest to the sequences of a cluster of isolates that includes PSTVd SJ1PL (KC707563); BLAST searches indicated 100% identity and 100% coverage. PSTVdToSAm130212C is closest to the sequences of the cluster of isolates that includes the isolates UK (AJ583449) and Naaldwijk isolate (X17268) and appears to fall within this cluster; BLAST searches indicated 98-99% identity and 98% coverage. PSTVdToSAm130211C is closest to this same cluster of isolates, but appears to fall outside the cluster; BLAST searches indicated 96% identity and 99% coverage. PSTVdToEA130225C is closest to the sequences of isolates DN12 (KR611353) and VNIKH-08-94B (JQ889846), with searches indicating 96% identity and 100% coverage. PSTVdToSAs27617C is closest to the sequences of the cluster isolates that includes ODN (KR611362) and WS_Bor-10-232m (JQ889848); BLAST indicated with 98% identity and 99% coverage. PSTVdToEA1291E is closest to the sequences of isolates Dasongping01 (KX159281) and 6131669 (KY936882); BLAST indicated 94% identity and 100% coverage. |
| PCFVd                                                                                                                                                                                                                                                                                                                                                                                                                                                                                                                                                                                                                                                                                                                                                                                                                                                                                                                                                                                                                                                                                                   |

PCFVdToNK567E, PCFVdCaEu27662C and PCFVdToAs1393E are closest to sequences of a cluster of isolates represented in the database that includes the isolates NK-12c2 (JF446898) and Somjit-20 (KM214229); BLAST searches indicated 98-99% identity and 100% coverage.

#### TASVd

TASVdToAs1433E and TASVdToNK1435E are closest to the sequences of a cluster of isolates that includes the isolates 5458774 (KX579067) and an unnamed Tunisian isolate(DQ144506); BLAST searches indicated 94-99% identity and 100% coverage.

#### TCDVd

TCDVdToAf130222C and TCDVdToAf130227C are closest to the sequences of a cluster of isolates that includes GBVdC\_TCDVd02 (KU714937) and an unnamed isolate from petunia in the UK (EF582393); BLAST searches indicated up to 99% identity and 96% coverage.

**Figure S1.** Alignment of CLVd sequences. The alignment shows there are extensive stretches of matching sequence.

```

CLVdCaEA1302154  cggaactaaactcgtggttcctgtggttcacacctgacctgcagccatgcaaagaaaaa
CLVdToNK1285E    cggaactaaactcgtggttcctgtggttcacacctgacctgcagccatgcaaagaaaaa
CLVdToME1155E    cggaactaaactcgtggttcctgtggttcacacctgacctgcagccatgcaa-aaaaa
CLVdToME1273E    cggaactaaactcgtggttcctgtggttcacacctgacctgcagccatgcaa-gaaaa
CLVdToAs1385E    cggaactaaactcgtggttcctgtggttcacacctgacctgcagccatgcaaagaaaaa
                    *****.*****.***

CLVdCaEA1302154  aagaacgggaggaagagcgcaaagagcgggtctcaggagccccggggcaactcagaccgag
CLVdToNK1285E    aagaacgggaggaagagcgcg-aagagcgggtctcaggagccccggggcaactcagaccgag
CLVdToME1155E    aagaacgggaggaagagcgcaaagagcgggtctcaggagccccggggcaactcagaccgag
CLVdToME1273E    aagaacgggaggaagagcgcaaagagcgggtctcaggagccccggggcaactcagaccgag
CLVdToAs1385E    aagaacgggaggaagagcgcg-aagagcgggtctcaggagccccggggcaactcagaccgag
                    *****.*****.*****.*****.*****.*****

CLVdCaEA1302154  cgggg--tcttgaccagtggcgagcgccctgttcagacaggagtaatcccagctgaaaca
CLVdToNK1285E    cgggg--tcttgaccagtggcgagcgccctgttcagacaggagtaatcccagctgaaaca
CLVdToME1155E    cgggg--tcttgaccagtggcgagcgccctgttcagacaggagtaatcccagctgaaaca
CLVdToME1273E    cgggg--tcttgaccagtggcgagtgccctgttcagacaggagtaatcccagctgaaaca
CLVdToAs1385E    cggggatcgcggaaccgagggcggaagcctgcttcagacaggagtaatcccagctgaaaca
                    *****.*****.*****.*****.*****.*****

CLVdCaEA1302154  ggggttttcaaccttcctttcttctggtttccttcctctgcttcagcgccctcgcccgag
CLVdToNK1285E    ggggttttcaaccttcctttcttctggtttccttcctctgcttcagcgccctcgcccgag
CLVdToME1155E    ggggttttcaaccttcctttcttctggtttccttcctctgcttcagcgccctcgcccgag
CLVdToME1273E    ggggttttcaaccttcctttcttctggtttccttcctctgcttcagcgccctcgcccgag
CLVdToAs1385E    ggggttttcaaccttcctttcttctggtttccttcctctgctt--gcggcctcgcccgag
                    *****.*****.*****.*****.*****.*****

CLVdCaEA1302154  tctt---gaccagcgcaggttctgacgcgaccggtggcatcaccgag--ttcgctcaagcc
CLVdToNK1285E    tctt---gaccagcgcaggttctgacgcgaccggtggcatcaccgagtttcgctcaaac
CLVdToME1155E    tctt---gaccagcgcaggttctgacgcgaccggtggcatcaccgag--ttcgctcaagcc
CLVdToME1273E    tctt---gaccagcgcaggttctgacgcgaccggtgggtatcaccgag--ttcgctcaagcc
CLVdToAs1385E    tcttcgaatccagcgcaggttctgacgcgaccggtggcatcaccgag--ttcgctcaagcc
                    ****.*****.*****.*****.*****.*****

CLVdCaEA1302154  tcaacctcctttttcttctattcta-gcttgggtctccgggaggggtgttagcccttgga
CLVdToNK1285E    tcaatctcctttttcttctattcta-gcttgggtctccgggaggggtgttagcccttgga
CLVdToME1155E    tcaacctcctttttcttcta-tcta-gcttgggtctccgggaggggtgttagcccttgga
CLVdToME1273E    tctacctcctttttcttcta-tcta-gcttgggtctccgggaggggtgttagcccttgga
CLVdToAs1385E    tcaacctcctttttcttctattctacgcttgggtctccgggaggggtgttagcccttgga
                    ***.*****.*****.*****.*****.*****

CLVdCaEA1302154  accgcagttggttcct
CLVdToNK1285E    accgcagttggttcct
CLVdToME1155E    accgcagttggttcct
CLVdToME1273E    accgcagttggttcct
CLVdToAs1385E    accgcagttggttcct
                    *****

```

|                 |                                                                                                            |
|-----------------|------------------------------------------------------------------------------------------------------------|
| PSTVdCaSAm13021 | -----GGGGAACACTTGGAGCGAACTGGCAATAAG-CGCGTGGGGAGTGCCACGCGGCCG                                               |
| PSTVdToSAm13021 | ----CGTGGGAAACCTGGAGCGAACTGGCAAAAGGCGCGGTGGGGAGTCCCTCGCGGCCG                                               |
| PSTVdToSAm13021 | -----AGGGGAAACCTGGAGCGCAACTGTCAAAGGCGCGGTGGGGAGAGCCTCGCGGCCG                                               |
| PSTVdToSAs27617 | -----CGGTGGGGAGTGCCACGCGGCCG                                                                               |
| PSTVdToEA1291E  | ATCCCCGGGGAAACCTGGAGCGAACTGGCAATAAGGACGCGTGGGGAGTGCCACGCGCGT                                               |
| PSTVdToEA130225 | -----GGGGAACACTTGGAGCGAACTGGCAATAAGGACGCGTGGGGAGTGCCACGCGGCCG<br>***** ** . ***** *                        |
| PSTVdCaSAm13021 | ACAGGAGTAATTTCCGCGCGAAACAGGGTTTTTACCCTTCCTTTCTTCGGGTGTCCTTCCT                                              |
| PSTVdToSAm13021 | ACAGGAGTAATTCCTGCTGAAACAGGGTTTTTACCCTTCCTTTCTTCAGGTTTCCTTCCT                                               |
| PSTVdToSAm13021 | ACAGGAGTAATTCAGCTGAAACAGGGTTTTTACCCTTCCTTTCTTCAGGTTTCCTTCCT                                                |
| PSTVdToSAs27617 | ACAGGAGTAATTTCCGCGCGAAACAGGGTTTTTACCCTTCCTTTCTTCGGGGGTCCATCCT                                              |
| PSTVdToEA1291E  | ACAGGAGTAATCCCGCGCTGANNNNNNNNNNNNACCCTTCCTTTCTTCGGGTTTCCTTCCT                                              |
| PSTVdToEA130225 | ACAGGAGTAATTTCCGCGCGAAACAGGGTTTTTACCCTTCCTTTTTTTCGGGTGTCCTTCCT<br>***** . ** * . ** ***** . ** . ** *** ** |
| PSTVdCaSAm13021 | CGCGCCCGCAGGACCACCCCTCGCCCCCT-TTG-CGCTGTCGCTTCGGCTACTACCCGGTG                                              |
| PSTVdToSAm13021 | CGCGCCCGCAGGATCACCCCTCGCCCCCT-TTG-CGCTGTCGCTTCGGCTACTACCCGGTG                                              |
| PSTVdToSAm13021 | CGCGCCCGCAGGATCGCCCCCTCGCCCCCT-TTG-CGCTGTCGCTTCGGCTACTACCCGGTG                                             |
| PSTVdToSAs27617 | CGCGCCCGCAGGACCACCCCTCGCCCCCTTTG-CGCTGTCGCTTCGGCTACTACCCGGTG                                               |
| PSTVdToEA1291E  | CGCGCCCGCAGGACCACCCCTCGCCCCCTTTG-CGCTGTCGCTTCGGCTACTACCCGGTG                                               |
| PSTVdToEA130225 | CGCGCCCGCAGGACCACCCCTCGCCCCCTTTGAAGCAGTCGGTTCGGGTAATACCCGGTG<br>***** . * . ***** . *** ** ***** ** *****  |
| PSTVdCaSAm13021 | GAAACAACCTGAAGCTCCCGAGAACCGCTTTTTTCTCTATCTTCC-TTGCTTCGGGGCGAGG                                             |
| PSTVdToSAm13021 | GAAACAACCTGAAGCTCCCGAGAACCGCTTTTTTCTCTATCTTGC-TGGTACCGGGCGAGG                                              |
| PSTVdToSAm13021 | GAAACAACCTGAACCTCCCGAGAACCGCTTTTTTCTATATCTTGC-TGGTACCGGGTCGAGG                                             |
| PSTVdToSAs27617 | GAAACAACCTGAAGCTCCCGAGAACCGCTTTTTTCTCTATCTTACTTTG-TTCGGGGCGAGG                                             |
| PSTVdToEA1291E  | GAAACAACCTGAAGCTCCCGAGAACCGCTTTTTTCTCTATCTTTCTTTGCTTCGGGGCGAGG                                             |
| PSTVdToEA130225 | GAAACAACCTGAAGCTCCCGAGAACCGCTTTTTTCTATATCTTACTTTG-TTCGGGGCGAGG<br>***** ***** ***** ***** * * * . **** *   |
| PSTVdCaSAm13021 | GTGTTTAGCCCTTGGAACCGCAGTTGGTTTCT-----                                                                      |
| PSTVdToSAm13021 | GTGTTTAGCCCTTGGAACCGCAGTTGGTTTCT-----                                                                      |
| PSTVdToSAm13021 | GTGTTTAGACCTTGGAACCACAGTTGGTTTCT-----                                                                      |
| PSTVdToSAs27617 | GTGTTTAGCCCTTGGAACCGCAGTTGGTTCTTCGGAATAAAGGCGGTCGAGGAGCGCTTCAGG                                            |
| PSTVdToEA1291E  | GTGTTTAGCCCTTGGAACCGCAGTTGGTTCTTCGGAATAAAGGCGGTCGAGGAGCGCTTCAGG                                            |
| PSTVdToEA130225 | GTGTTTAGCC-----<br>***** **                                                                                |
| PSTVdCaSAm13021 | -----                                                                                                      |
| PSTVdToSAm13021 | -----                                                                                                      |
| PSTVdToSAm13021 | -----                                                                                                      |
| PSTVdToSAs27617 | CACACCTGACCTCCTAACAATGCAAGAAAAAGAGGCGGCTCGGAGGAGCGCTTCAGG                                                  |
| PSTVdToEA1291E  | CACACCTGACCTCCTGAGCA-GAAAAAGAAAAAGAGGCGGCTCGGAGGAGCGCTTCAGG                                                |
| PSTVdToEA130225 | -----                                                                                                      |
| PSTVdCaSAm13021 | -                                                                                                          |
| PSTVdToSAm13021 | -                                                                                                          |
| PSTVdToSAm13021 | -                                                                                                          |
| PSTVdToSAs27617 | A                                                                                                          |
| PSTVdToEA1291E  | G                                                                                                          |
| PSTVdToEA130225 | -                                                                                                          |

|                 |                                                                                           |
|-----------------|-------------------------------------------------------------------------------------------|
| PCFVdToNK567E;  | cgggattcttcttaaggggtgcctgtggtgcctccccgaagcccgcttagggaaaaaagaaa                            |
| PCFVdCaEu27662C | cgggattcttcttaaggggtgcctgtggtgcctccccgaagcccgcttagggaaaaaagaaa                            |
| PCFVdToAs1393E  | cgggattcttcttaaggggtgcctgtggtgcctccccgaagcccgcttagggaaaaaagaaa<br>*****.*****             |
| PCFVdToNK567E;  | ggggaagcaagcatctcctgttcagggatccccggggaaacctggacagaccgggcgagg                              |
| PCFVdCaEu27662C | ggggaagcaagcatctcctgttcagggatccccggggaaacctggacagaccgggcgagg                              |
| PCFVdToAs1393E  | ggggaagcaagcatctcctgttcagggatccccggggaaacctgaacagatcgggcgagg<br>*****.*****.*****         |
| PCFVdToNK567E;  | aagcgcacgagcgggaccgtcttctgtacaggagtaatccccgctgaaacagggttttcac                             |
| PCFVdCaEu27662C | aagcgcacgagcgggaccgtcttctgtacaggagtaatccccgctgaaacagggttttcac                             |
| PCFVdToAs1393E  | aagcgc-cgtgcgggtcggctcttctgacaggactannnnnnnnnnnnnnnnnnnnnnnnnn<br>***** ** *****.***** ** |



## Sequences

>CLVdCaEA1302154C

CGGAACTAAACTCGTGGTTCCTGTGGTTCACACCTGACCCTGCAGCCATGCAAAGAAAAAAGAACGGGAGGAAGAGCG  
CAAAGAGCGGTCTCAGGAGCCCCGGGGCAACTCAGACCGAGCGGGGTCTTGACCAGTGGCGAGCGCCCTGTTAGACA  
GGAGTAATCCCAGCTGAAACAGGGTTTTACCCCTTCCTTTCTTCTGGTTTCCTTCCTCTGCTTCAGCGGCCTCGCCCGGAGT  
CTTGACCAGCGCAGGTTCTGACGCGACCGGTGGCATCACCGAGTTTCGCTCAAGCCTCAACCTCCTTTTTCTTCATTCTAGCT  
TGGTCTCCGGGCGAGGGTGTTAGCCCTTGAACCGCAGTTGGTTCCT

>CLVdToNK1285E

CGGAACTAAACTCGTGGTTCCTGTGGTTCACACCTGACCCTGCAGCCATGCAAAGAAAAAAGAACGGGAGAAAGAGCG  
CAAGAGCGGTCTCAGGAGCCCCGGGGCAACTCAGACCGAGCGGGGTCTTGACCAGTGGCGAGCGCCCTGTTAGACAG  
GAGTAATCCCAGCTGAAACAGGGTTTTACCCCTTCCTTTCTTCTGGTTTCCTTCCTCTGCTTCAGCGGCCTCGCCCGGAGT  
TTGACCAGCGCAGGTTCTGACGCGACCGGTGGCATCACCGAGTTTCGCTCAAACCTCAATCTCCTTTTTCTTCATTCTAGCT  
TGGTCTCCGGGCGAGGGTGTTAGCCCTTGAACCGCAGTTGGTTCCT

>CLVdToME1155E

CGGAACTAAACTCGTGGTTCCTGTGGTTCACACCTGACCCTGCGGCCATGCAAAAAAAGAACGGGAGGAAGAGCGC  
AAAGAGCGGTCTCAGGAGCCCCGGGGCAACTCAGACCGAGCGGGGTCTTGACCAGTGGCGAGCGCCCTGTTAGACAG  
GAGTAATCCCAGCTGAAACAGGGTTTTACCCCTTCCTTTCTTCTGGTTTCCTTCCTCTGCTTCAGCGGCCTCGCCCGGAGT  
TTGACCAGCGCAGGTTCTGACGCGACCGGTGGCATCACCGAGTTTCGCTCAAGCCTCCACCTCCTTTTTCTCTATCTAGCTTG  
GTCTCCGGGCGAGGGTGTTAGCCCTTGAACCGCAGTTGGTTCCT

>CLVdToME1273E

CGGAACTAAACTCGTGGTTCCTGTGGTTCACACCTGACCCTGCAGCCATGCAAAGAAAAAAGAACGGGAGGAAGAGCGC  
AAAGAGCGGTCTCTGGAGCCCCGGGGCAACTCAGACCGAGCGGGGTCTTGACCAGTGGCGAGTGCCCTGTTAGACAG  
GAGTAATCCCAGCTGAAACAGGGTTTTACCCCTTCCTTTCTTCTGGTTTCCTTCCTCTGCTTCAGCGGCCTCGCCCGGAGT  
TTGACCAGCGCAGGTTCTGACGCGACCGGTGGTATCACCGAGTTTCGCTCAAGCCTCTACCTCCTTTTTCTCTATCTAGCTTG  
GTCTCCGGGCGAGGGTGTTAGCCCTTGAACCGCAGTTGGTTCCT

>CLVdToAs1385E

CGGAACTAAACTCGTGGTTCCTGTGGTTCACACCTGACCCTGCAGCCATGCAAAGAAAAAAGAACGGGAGGAAGAGCG  
CAAGAGCGGTCTCAGGAGCCCCGGGGCAACTCAGACCGAGCGGGGATCGCGGACCGAGGGCGGAAGCCTGCTTCAGAC  
AGGAGTAATCCCCGTGAAACAGGGTTTTACCCCTTCCTTTCTTCTGGGTTTCCTTCCTCTGCTTGCGGCCTCGCCCGGAGT  
TTCGAATCCAGCGCAGGTTCTGACGCGACCGGTGGCATCACCGAGTTGCTCAAGCCTCAACCTCCTTTTTCTCTATTCTACG  
CTTGCTCTCCGGGCGAGGGTGTTAGCCCTTGAACCGCAGTTGGTTCCT

>PSTVdCaSAm1302191C

GGGGAAACCTGGAGCGAACTGGCAATAAGGCGGTGGGGAGTGGCCAGCGGCCGACAGGAGTAATCCCGCCGAAACAG  
GGTTTTACCCCTTCCTTTCTCGGGTGTCTTCCTCGCGCCCGCAGGACCACCCCTCGCCCCCTTGCGCTGTCGCTTCGGCTA  
CTACCCGGTGGAACAACCTGAAGCTCCCGAGAACCGCTTTTTCTCTATCTTCCTTGCTTCGGGGCGAGGGTGTTAGCCCT  
TGAACCGCAGTTGGTTCCT

>PSTVdToSAm130212C

CGTGGGAAACCTGGAGCGAACTGGCAAAAGGCGCGGTGGGGAGTCCCTCGCGGCCGACAGGAGTAATTCCTGCTGAAA  
CAGGGTTTTACCCCTTCCTTTCTCAGGTTTCCTTCCTCGCGCCCGCAGGATCACCCCTCGCCCCCTTGCGCTGTCGCTTCGG  
CTACTACCCGGTGGAACAACCTGAAGCTCCCGAGAACCGCTTTTTCTCTATCTTGCTGGTACCGGGGCGAGGGTGTTAGC  
CCTTGAACCGCAGTTGGTTCCT

>PSTVdToSAm130211C

AGGGGAAACCTGGAGCCAACCTGTCAAAGGCGCGGTGGGGAGAGCCTCGCGGCCGACAGGAGTAATTCAGCTGAAAC  
AGGGTTTTACCCCTTCCTTTCTCAGGTTTCCTTCCTCGCGCCCGCAGGATCGCCCTCGCCCCCTTGCGCTGTCGCTTCGGC  
TACTACCCGGTGGAACAACCTGAACCTCCCGAGAACCGCTTTTTCTATATCTTGCTGGTACCGGGTGCAGGGTGTTAGAC  
CTTGAACCGCAGTTGGTTCCT

>PSTVdToEA130225C

GGGGAACTTGGAGCGAACTGGCAATAAGGACGGTGGGGAGTGCCAGCGGCCGACAGGAGTAATCCCGCCGAAACA  
GGGTTTTACCCCTTCTTTTTTCGGGTGTCCTTCTCGCGCCCGCAGGACCACCCCTCGCCCCCTTTGAAGCAGTCGGTTCG  
GGTAATACCCGGTGGAAACAACCTGAAGCTCCCGAGAACCGCTTTTCTATATCTTACTTTGTTGCGGGCGAGGGTGTTAG  
CCC

>PSTVdToSAs27617C

CGGTGGGGAGTGCCAGCGGCCGACAGGAGTAATCCCGCCGAAACAGGGTTTTACCCCTTCTTTCTCGGGGGTCCAT  
CCTCGCGCCCGCAGGACCACCCCTCGCCCCCTTTGCGCTGTCGCTTCGGCTACTACCCGGTGGAAACAACCTGAAGCTCCCG  
AGAACCCTTTTTCTCTATCTTACTTTGTTGCGGGCGAGGGTGTTAGCCCTTGAACCGCAGTTGGTTCCTCGGAACTAA  
ACTCGTGGTTCCTGTGGTTCACACCTGACCTCCTAACAATGCAAAGAAAAAAGAAGGCGGCTCGGAGGAGCGCTTCAGG  
A

>PSTVdToEA1291E

ATCCCGGGGAAACCTGGAGCGAACTGGCAATAAGGACGGTGGGGAGTGCCAGCGGCTGACAGGAGTAATCCCGCT  
GAnnnnnnnnnnnACCCTTCTTTCTTCGGGTTTCTTCTCGCGCCCGCAGGACCACCCCTCGCCCCCTTTGCGCTGTCGC  
TTCGGCTACTACCCGGTGGAAACAACCTGAAGCTCCCGAGAACCGCTTTTTCTCTATCTTTCTTTGCTTCGGGGCGAGGGTG  
TTTAGCCCTTGAACCGCAGTTGGTTCCTCGGAACTAAACTCGTGGTTCCTGTGGTTCACACCTGACCTCCTGAGCAGAAA  
AGAAAAAGAAGGCGGCTCGGAGGAGCGCTTCAGG

> PCFVdToNK567E; this sequence is available in GenBank as KC762952.1

CCGGATTCTTCTAAGGGTGCCTGTGGTGCCTCCCCGAAGCCCGCTAGGGAAAAAGAAAGGGGAAGCAAGCATCTCCT  
GTTACAGGGATCCCCGGGGAAACCTGGACAGACCGGGCGGAGAAGCGCACGAGCGGGACCGTCTTCTGACAGGAGTAAT  
CCCCGCTGAAACAGGGTTTTACCCCTTCTTTCTTCGGGTTTCTTCTCAGTCGACCGGTCCGCGTCGGCCTTCTCGCGCA  
CTGCTGTCCGGCTACTACCCGGTGGATAACAATGACAGAGGTGCTTTTTCTTCCACCAACTTCTACCGACGCGGCCGGGA  
GTGAAGCTACCCGGGACCCGAGAGGATCT

>PCFVdCaEu27662C

CCGGATTCTTCTAAGGGTGCCTGTGGTGCCTCCCCGAAGCCCGCTAGGGAAAAAGAAAGGGGAAGCAAGCATCTCCT  
GTTACAGGGATCCCCGGGGAAACCTGGACAGACCGGGCGGAGAAGCGCACGAGCGGGACCGTCTTCTGACAGGAGTAAT  
CCCCGCTGAAACAGGGTTTTACCCCTTCTTTCTTCGGGTTTCTTCTCAGTCGACCGGTCCGCGTCGGCCTTCTCGCGCA  
CTGCTGTCCGGCTACTACCCGGTGGATAACAATGACAGAGGTGCTTTTTCTTCCACCAACTTCTACCGACGCGGCCGGGA  
GTGAAGCTACCCGGGACCCGAGAGGATCT

>PCFVdToAs1393E

CCGGATTCTTCTAAGGGTGCCTGTGGTGCCTCCCCGAAGCCCGCTAGGGAAAAAGAAAGGGGAAGCAAGCATCTCCT  
GTTACAGGGATCCCCGGGGAAACCTGAACAGATCGGGCGGAAAAGCGCCGTGCGGGTCCGTCTTCTGACAGGACTANN  
NNNNNNNNNNNNNNNNNNNNNNNNNNNNNNNNNNNNNNNNNNNNNNNNNNNNNNNNNNNNNNNNNNNNNNNNNNNN  
TCGCGCACTTCTGTTTCGGAGACTACCCGGTGGATAACAATGACAGAGGTGCTTTTTCTTCCACCTGCTTCTACCGACGCG  
GCCGGGAGTGAAGCTACCCGGGACCCGAGAGGATCT

>TASVdToAs1433E

CATCAAGAAAAAAGATAGGCGCGGGAGCGAAGAAGTCCTTACGGGATCCCCGGGGAAACCCGAAGGAAGTCGAGGAC  
GGGGGCTTCCGACTACTCCCGTGTGAGACAGGAGTAATCCAGCTGAAACAGGGTTTTACCCCTTCTTTCTTCTGGTTTC  
CTTCTCTCGCCTGGAGAGGTCTTCGGCCCTCGCCCGGAGCTTCTCTTAGGAGACTACCCGGTGGATAACAATGAAGCTTC  
AACCTCCACGCGCTTTTTCTCTATCTTTGTTGCTCTCCGGGCGAGGGTGAAAGCCCGTGGAACCTACTAAGAGTCCCT

>TASVdToNK1435E

CATCAAGAAAAAAGATAGGCGCGGGAGCGAAGAAGTCCTTACGGGATCCCCGGGGAAACCCGAAGGAAGTCGAGGAC  
GGGGGCTTCCGACTACTCCCGTGTGAGACAGGAGTAATCCAGCTGAAACAGGGTTTTACCCCTTCTTTCTTCTGGTTTC  
CTTCTCTCGCCTGGAGAGGTCTTCGGCCCTCGCCCGGAGCTTCTCTTAGGAGACTACCCGGTGGATAACAATGAAGCTTC  
AACCTCTCGCGCTTTTTCTCTATCTTTGTTGCTCTCCGGGCGAGGGTGAAAGCCCGTGGAACCTAGTAAGAGTCCCT

>TCDVdToAf130222C

GAACAGGAGTAATCCCGAGAGAAACAGGGTTTTACCCCTTCTTTCTGATTGCGTTTCCTTCTTTGCGCGCCACTCGACCC  
CTCGCCCCCTTGCCTGTCGCTTCGGCAACTACCCGGTGGAAACAACCTGAAGCTCCCGAGAACCGCTTTTTCTCTATCTTGC

TGCTACCGGGGCGAGGGTGTTCAGCCCTTGGAACCGCAGTTGGTTCCTCGGAACTAACTCGTGGTTCCTGTGGTTCAGA  
CCTGACCTCCTGTGCAGAAAAGAAAAAAGATAGGCGGCTCGGAGGAGCGCTTCAGGA

> TCDVdToAf130227C

GGGGAAACCTGGACGGAAGTGGCAAAAGGCGGCAGGGAGCTTGTGGAAGGCGAAACAGGAGTAATCCCGAGAGAAAC  
AGGGTTTTACCCCTTCCTTCTGATTCGGTTTCCTTCTTTCGCGCGCCACTCGACCCCTCGCCCCCTTGCCTGTGCTTCGG  
CAACTACCGGTGGAAACAAGTCCCGAGAACCGCTTTTCTCTATCTTGCTGCTACCGGGGCGAGGGTGTTCAGC  
CCTTGGAACCGCAGTTGGTTCCTCGGAACTAACTCGTGGTTCCTGTGGTTCACACCTGACCTCCTGTGCAGAAAAGAAAA  
AAGATAGGCGGCTCGGAGGAGCGCTTCAGGATAGGCCATGT
